# Supplementary material
Source: Elsevier journal article supplement (https://www.sciencedirect.com/science/article/pii/S1413355523000059)
Supplement: mmc1 [file S1413355523000059:mmc1.xlsx]

## Sheet: Title page
					Supplemental Material 1
					Authors
					Keep posting and following social media profiles about physical therapy, but be aware!
					A cross-sectional study of social media posts on Instagram and Twitter
					Individual Data Used for the Analyzes

## Sheet: Posts analysis
Number	Social Media	Language	Physiotherapy-related Content	Use of references	Present only positive findings	Consistency of information	Presence of potential conflict of interest	Post included professional contacts	Profile had published advertisement	Type of Dissemination	Tools for dissemination	Number of followers	Number of likes	Number of comments	Number of shares
001	Twitter	English	Gait retraining, exercises and joint mobilization for congenital dislocation of the hip	No	not applicable	not applicable	No	No	No	Simple dissemination	Infographic	1705	36	2	2
002	Twitter	English	Stretching after exercise to reduce pain	No	not applicable	not applicable	Yes	Yes	Yes	Self-promotion	Text	8	0	0	0
003	Twitter	English	Exercise for pelvic pain	No	not applicable	not applicable	Yes	No	Yes	Simple dissemination with conflict	Text and website link	0	0	0	0
004	Twitter	English	Exercise for people during cancer treatment	No	not applicable	not applicable	Yes	No	Yes	Simple dissemination with conflict	Text and website link	25	1	0	0
005	Twitter	English	Cryotherapy for muscle strain, pain and inflammation	No	not applicable	not applicable	No	No	No	Simple dissemination	Text and video	41	1	0	0
006	Twitter	English	Myofascial release and education for chronic pain	No	not applicable	not applicable	Yes	No	Yes	Self-promotion	Text	320	0	0	0
007	Twitter	English	Rehabilitation for people with long COVID	No	not applicable	not applicable	No	No	No	Simple dissemination	Infographic and website link	90	11	0	5
008	Twitter	English	Strengthening for patellofemoral pain	No	not applicable	not applicable	Yes	Yes	No	Self-promotion	Text and website link	261	1	0	0
009	Twitter	English	Rehabilitation for people after COVID	Yes	No	Accurate	No	No	No	Simple dissemination	Text, paper link and image of title page	105	86	3	65
010	Twitter	English	Electrotherapy and exercise for knee pain and ACL rehabilitation	No	not applicable	not applicable	Yes	No	Yes	Simple dissemination with conflict	Infographic	4359	0	0	0
011	Twitter	English	Joint mobilization for knee pain	No	not applicable	not applicable	Yes	Yes	No	Self-promotion	Text and website link	194	0	0	0
012	Twitter	English	Exercise for low-back pain	No	not applicable	not applicable	Yes	Yes	No	Self-promotion	Text, figure, and website link	194	2	0	0
013	Twitter	English	Exercise to improve mobility and muscle strength of the lumbar region	No	not applicable	not applicable	Yes	Yes	No	Self-promotion	Text, figure, and website link	194	1	0	0
014	Twitter	English	Stretching for back pain	No	not applicable	not applicable	No	No	No	Simple dissemination	Infographic	129	0	0	0
015	Twitter	English	Stretch and mobilization exercises for people qith breast cancer	No	not applicable	not applicable	Yes	Yes	Yes	Self-promotion	Video	1411	1	0	0
016	Twitter	English	Thermotherapy for pain	No	not applicable	not applicable	Yes	No	Yes	Self-promotion	Text and infographic	14	1	0	0
017	Twitter	English	Occupational rehabilitation aiming muscle capacity, biomechanical alterations and pain reducing	No	not applicable	not applicable	Yes	Yes	No	Self-promotion	Text, infographic and website link	7076	0	0	0
018	Twitter	English	Exercises to improve balance	No	not applicable	not applicable	Yes	Yes	No	Self-promotion	Text and website link	7076	1	0	0
019	Twitter	English	Exercises using elastic resistance for wrist and elbow pain	No	not applicable	not applicable	Yes	Yes	Yes	Self-promotion	Text, figure, and website link	91	0	0	0
020	Twitter	English	Exercises using elastic resistance to reduce pain	No	not applicable	not applicable	Yes	Yes	Yes	Self-promotion	Text, video, and website link	91	0	0	0
021	Twitter	English	Exercise for knee pain	No	not applicable	not applicable	Yes	Yes	Yes	Self-promotion	Text, figure, and website link	91	1	0	0
022	Twitter	English	Exercises using elastic resistance to reduce pain related to sciatic nerve	No	not applicable	not applicable	Yes	Yes	Yes	Self-promotion	Text, figure, and website link	91	0	0	0
023	Twitter	English	Dry needling to manage pain, improve mobility, relax muscles and improve motor behavior	No	not applicable	not applicable	Yes	Yes	Yes	Self-promotion	Text and infographic	864	0	0	0
024	Twitter	English	Manual lymphatic drainage and ultrasound to restore milk flow in mothers	No	not applicable	not applicable	Yes	Yes	Yes	Self-promotion	Text	30	0	0	0
025	Twitter	English	Pilates to prevent diseases	No	not applicable	not applicable	Yes	Yes	Yes	Self-promotion	Text and infographic	30	0	0	0
026	Twitter	English	Physiotherapy aiming pelvic floor disfunctions	No	not applicable	not applicable	Yes	No	Yes	Self-promotion	Text and website link	30	1	0	1
027	Twitter	English	Myofascial release to reduce pain and increase mobility	No	not applicable	not applicable	Yes	Yes	No	Self-promotion	Text and website link	5	0	0	0
028	Twitter	English	Massage therapy for diastasis recti	No	not applicable	not applicable	No	No	No	Simple dissemination	Text	437	0	0	0
029	Twitter	English	Exercise with blood flow restriction to treat musculoskeletal injuries	No	not applicable	not applicable	Yes	Yes	Yes	Self-promotion	Text, figure, and website link	89	0	0	0
030	Twitter	English	Strengthening for cerebral palsy	Yes	No	Accurate	No	No	No	Facilitated Information	Text and website link	821	0	0	0
031	Twitter	English	Physiotherapy for oncologic patients	No	not applicable	not applicable	No	No	No	Simple dissemination	Text and website link	14582	2	0	0
032	Twitter	English	Exercise and massage for mobility	No	not applicable	not applicable	No	No	No	Simple dissemination	Text and website link	2	0	0	0
033	Twitter	English	Kinesiotaping to reduce pain and treat injuries	Yes	Yes	Innacurate	Yes	No	Yes	Simple dissemination with conflict	Text, figure, and website link	387	0	0	0
034	Twitter	English	Physiotherapy to manage and prevent osteoporosis	No	not applicable	not applicable	Yes	Yes	No	Self-promotion	Text and website link	20	2	0	1
035	Twitter	English	Exercise and education to treat patients with rheumatoid arthritis	Yes	No	Accurate	No	No	No	Simple dissemination	Text and image of paper`s title	1328	5	0	2
036	Twitter	English	Effectiveness of early physiotherapy to treat work-related injuries	No	not applicable	not applicable	Yes	Yes	No	Self-promotion	Text and website link	2267	1	0	0
037	Twitter	English	Stretching to prevent epicondylitis	No	not applicable	not applicable	Yes	Yes	Yes	Self-promotion	Text, infographic and website link	1756	0	0	0
038	Twitter	English	Exercise to reduce high blood pressure	No	not applicable	not applicable	Yes	No	Yes	Simple dissemination with conflict	Text and infographic	472	1	0	0
039	Twitter	English	Virtual reality to treat patients with vestibular disorders	No	not applicable	not applicable	Yes	Yes	Yes	Self-promotion	Text and figure	472	3	0	1
040	Twitter	English	Exercise to prevent falls	No	not applicable	not applicable	Yes	No	Yes	Simple dissemination with conflict	Text, infographic and website link	472	0	0	0
041	Twitter	English	Stretching to prevent pain	No	not applicable	not applicable	Yes	Yes	No	Self-promotion	Text and figure	147	2	0	0
042	Twitter	English	Pilates to reduce pain	No	not applicable	not applicable	Yes	Yes	No	Self-promotion	Text and figure	147	1	0	0
043	Twitter	English	Change running biomechanics to prevent injuries	No	not applicable	not applicable	Yes	Yes	No	Self-promotion	Text and figure	147	1	0	0
044	Twitter	English	Electrostimulation to improve mobility of patients with Parkinson disease or after stroke	No	not applicable	not applicable	Yes	Yes	No	Self-promotion	Text and video	12	0	0	0
045	Twitter	English	Telerehabilitation for rehabilitation of physical disabilities	Yes	No	Accurate	No	No	No	Simple dissemination	Text and paper link	2855	1	0	0
046	Twitter	English	Telerehabilitation based on exercise for people with spinal cord injury	Yes	No	Accurate	No	No	No	Simple dissemination	Text and paper link	2855	0	0	1
047	Twitter	English	Magnetotherapy to manage pain	No	not applicable	not applicable	No	No	No	Simple dissemination	Text and website link	87	0	0	0
048	Twitter	English	Manual spine traction to decrease low back pain	Yes	Yes	Partial	Yes	No	Yes	Simple dissemination with conflict	Text and paper link	616	1	0	0
049	Twitter	English	Electrotherapy to reduce pain	No	not applicable	not applicable	Yes	Yes	No	Self-promotion	Text, figure, and website link	3164	0	0	0
050	Twitter	English	Physiotherapy before surgeries to prevent complication	No	not applicable	not applicable	Yes	Yes	No	Self-promotion	Text, figure, and website link	3164	3	0	2
051	Twitter	English	Early cardiac rehabilitation to improve function of people with heart failure	Yes	No	Accurate	No	No	No	Simple dissemination	Text and paper link	2398	2	0	2
052	Twitter	English	Exercise to improve mobility, function and pain in people with frozen shoulder	Yes	No	Accurate	No	No	No	Simple dissemination	Text and paper link	2398	10	0	4
053	Twitter	English	Physiotherapy to treat people after stroke	Yes	No	Accurate	Yes	Yes	No	Facilitated Information with conflict	Infographic	671	1	0	0
054	Twitter	English	Rest, cryotherapy, compression and elevation for ankle sprain	No	not applicable	not applicable	No	No	No	Simple dissemination	Text	329	0	0	0
055	Twitter	English	Aquatic therapy, exercise and thermotherapy for spinal stenosis	No	not applicable	not applicable	Yes	Yes	No	Self-promotion	Text and website link	61	1	0	1
056	Twitter	English	Exercise for sciatica	No	not applicable	not applicable	Yes	Yes	No	Self-promotion	Text and website link	34	1	0	1
057	Twitter	English	Post-surgery physiotherapy to increase recovery	No	not applicable	not applicable	No	No	No	Simple dissemination	Text and website link	30	0	0	0
058	Twitter	English	Pediatric physiotherapy targeting child development, muscle weakness, balance and motor coordenation	No	not applicable	not applicable	Yes	Yes	Yes	Self-promotion	Infographic	12	0	0	0
059	Twitter	English	Gait retraining and aquatic activities to improve walking after stroke	No	not applicable	not applicable	No	No	No	Simple dissemination	Text	195	2	0	1
060	Twitter	English	Physiotherapy to prevent injuries, decrease pain, treat injuries, relax, increase strength and flexibility of athletes	No	not applicable	not applicable	No	No	No	Simple dissemination	Text	192	0	0	0
061	Twitter	English	Plank exercises to increase muscle strength and posture	No	not applicable	not applicable	No	No	No	Simple dissemination	Infographic	44	1	0	0
062	Twitter	English	High-intensity physiotherapy to treat people after stroke	No	not applicable	not applicable	Yes	No	Yes	Self-promotion	Text and website link	296	0	0	0
063	Twitter	English	Exercise, orthosis and bandages to prevent injuries in dancers	No	not applicable	not applicable	No	No	No	Simple dissemination	Text and infographic	423	4	1	2
064	Twitter	English	Mckenzie method to rehabilitate people with injuries	No	not applicable	not applicable	Yes	No	Yes	Simple dissemination with conflict	Text and website link	26	2	0	0
065	Twitter	English	Exercise for stroke patients	Yes	No	Accurate	No	No	No	Facilitated Information	Text, figure and paper link	1083	1	0	0
066	Twitter	English	Exercise and manual therapy for neck pain after concussion	No	not applicable	not applicable	No	No	No	Simple dissemination	Text and infographic	93	1	0	0
067	Twitter	English	Physiotherapy to manage long-term symptoms of COVID	No	not applicable	not applicable	Yes	No	No	Self-promotion	Text and website link	75	0	0	0
068	Twitter	English	Gait retraning using exoskeleton to improve function in stroke patients	Yes	No	Partial	Yes	No	Yes	Facilitated Information with conflict	Text, figure and paper link	5945	1	0	1
069	Twitter	English	Exercise to relief shoulder pain	No	not applicable	not applicable	Yes	Yes	No	Self-promotion	Infographic	265	11	1	2
070	Twitter	English	Physiotherapy and exercise to manage oncologic patients	No	not applicable	not applicable	No	No	No	Simple dissemination	Infographic	265	10	0	2
071	Twitter	English	Cryotherapy, insoles, orthosis and stretching for plantar fasciitis	No	not applicable	not applicable	No	No	No	Simple dissemination	Infographic	265	10	0	4
072	Twitter	English	Telerehabilitation to treat different injuries	No	not applicable	not applicable	No	No	No	Simple dissemination	Infographic	55	3	0	1
073	Twitter	English	Strengthening for lateral hip pain	No	not applicable	not applicable	Yes	No	Yes	Simple dissemination with conflict	Video	335	0	0	0
074	Twitter	English	Exercise for rehabilitation after anterior cruciate ligament injury	No	not applicable	not applicable	Yes	Yes	No	Self-promotion	Text and figure	385	8	0	0
075	Twitter	English	Rehabilitation for people with long COVID	Yes	No	Accurate	No	No	No	Simple dissemination	Text, paper link and image of title page	7466	9	0	7
076	Twitter	English	Rehabilitation for people with long COVID	No	not applicable	not applicable	No	No	No	Simple dissemination	Text and infographic	7466	58	3	37
077	Twitter	English	Energy management during rehabilitation for people with long COVID	No	not applicable	not applicable	No	No	No	Simple dissemination	Text and infographic	7455	133	0	80
078	Twitter	English	Rehabilitation for people with long COVID	Yes	No	Accurate	No	No	No	Simple dissemination	Text, paper link and image of title page	7455	18	1	7
079	Twitter	English	Rehabilitation for anterior cruciate ligament reconstruction	No	not applicable	not applicable	No	No	No	Simple dissemination	Text and video	78	8	0	1
080	Twitter	English	Strengthening to address muscle weakness	No	not applicable	not applicable	No	No	No	Simple dissemination	Text and video	78	1	0	0
081	Twitter	English	Exercise for rehabilitation after anterior cruciate ligament injury	No	not applicable	not applicable	No	No	No	Simple dissemination	Text and video	78	0	0	0
082	Twitter	English	Exercise, bandage, manual therapy and education for toe injuries	No	not applicable	not applicable	Yes	Yes	No	Self-promotion	Text, infographic and website link	24	1	0	0
083	Twitter	English	Exercise, postural correction, dry needleing and manual therapy for migraine	No	not applicable	not applicable	Yes	Yes	No	Self-promotion	Text, infographic and website link	24	2	0	0
084	Twitter	English	Physiotherapy to manage chronic pain	Yes	No	Partial	No	No	No	Facilitated Information	Text and website link	24	0	0	0
085	Twitter	English	Thermotherapy, manual therapy, exercise and aquatic therapy to decrease pain in lumbar herniated disc	No	not applicable	not applicable	Yes	Yes	No	Self-promotion	Text, infographic and website link	24	0	0	0
086	Twitter	English	Rehabilitation aiming analgesia	No	not applicable	not applicable	No	No	No	Simple dissemination	Text and video	30	0	0	0
087	Twitter	English	Electrotherapy for chronic pain	No	not applicable	not applicable	Yes	No	Yes	Self-promotion	Text and infographic	428	0	0	1
088	Twitter	English	Education to decrease pain and improve function in people with musculoskeletal problems	Yes	No	Partial	No	No	No	Facilitated Information	Text and paper link	403	2	0	2
089	Twitter	English	Manual therapy for non-chronic low back pain	No	not applicable	not applicable	No	No	No	Simple dissemination	Text and website link	402	3	0	2
090	Twitter	English	Intensive exercise program for Parkinson disease	Yes	No	Accurate	No	No	No	Simple dissemination	Text and paper link	822	3	0	0
091	Twitter	English	Rehabilitation for people with long COVID	No	not applicable	not applicable	No	No	No	Simple dissemination	Infographic	101	2	0	1
092	Twitter	English	Manual therapy to improve mobility in people with osteoarthritis	Yes	No	Partial	No	No	No	Facilitated Information	Text and image of paper	86	0	0	1
093	Twitter	English	Magnetotherapy to relief pain	No	not applicable	not applicable	Yes	Yes	Yes	Self-promotion	Text and website link	592	4	0	2
094	Twitter	English	Magnetotherapy for shoulder pain	No	not applicable	not applicable	Yes	Yes	Yes	Self-promotion	Text and website link	592	4	1	0
095	Twitter	English	Rehabilitation for people with long COVID	No	not applicable	not applicable	No	No	No	Simple dissemination	Infographic	678	3	0	0
096	Twitter	English	Exercise to prevent frozen shoulder	No	not applicable	not applicable	No	No	No	Simple dissemination	Text and infographic	5	1	0	0
097	Twitter	English	Stretching to prevent knee and ankle pain	No	not applicable	not applicable	Yes	Yes	No	Self-promotion	Text and website link	477	0	0	0
098	Twitter	English	Exercise for rehabilitation after anterior cruciate ligament injury	Yes	No	Partial	Yes	Yes	No	Facilitated Information with conflict	Text and website link	477	1	0	0
099	Twitter	English	Physiotherapy to increase strength, balance and preventy injuries in elderly people	No	not applicable	not applicable	Yes	No	No	Self-promotion	Text and website link	11	0	0	0
100	Twitter	English	Ergonomic correction to prevent injuries	No	not applicable	not applicable	Yes	Yes	No	Self-promotion	Text, infographic and website link	410	0	0	0
101	Twitter	English	Education in how to move in order to prevent low back pain	No	not applicable	not applicable	Yes	Yes	No	Self-promotion	Text, infographic and website link	410	1	0	0
102	Twitter	English	Wim Hof method for autoimmune diseases	Yes	Yes	Partial	Yes	No	Yes	Simple dissemination with conflict	Text and website link	8843	5	0	0
103	Twitter	English	Physiotherapy to treat and prevent different condition	No	not applicable	not applicable	Yes	Yes	Yes	Self-promotion	Text and website link	17	0	0	0
104	Twitter	English	Pediatric physiotherapy to improve gait	No	not applicable	not applicable	Yes	Yes	No	Self-promotion	Text and website link	4396	5	0	6
105	Twitter	English	Exercise for muscle injury	No	not applicable	not applicable	No	No	No	Simple dissemination	Text and video	31	1	0	0
106	Twitter	English	Rehabilitation for people with long COVID	Yes	No	Accurate	No	No	No	Facilitated Information	Text and website link	11176	45	6	28
107	Twitter	English	Reabilitation to to treat people with COVID	Yes	No	Accurate	No	No	No	Facilitated Information	Text and website link	11176	16	1	10
108	Twitter	English	Gait retraning decreasing gravitional force to increase strength, mobility, balance and endurance	No	not applicable	not applicable	Yes	No	Yes	Self-promotion	Text and video	595	1	0	0
109	Twitter	English	Effects of orthoses on postural control and muscle activity in children with cerebral palsy	Yes	No	Accurate	No	No	No	Simple dissemination	Images of the abstract and paper link	9	1	0	0
110	Twitter	English	Effects of kinesiotaping on muscle strength of children and adolescents with cerebral palsy	Yes	No	Accurate	No	No	No	Simple dissemination	Images of the abstract and paper link	9	0	0	2
111	Twitter	English	Effects of resistance exercise for rehabilitation of people with hand osteoarthritis	Yes	No	Accurate	No	No	No	Simple dissemination	Images of the abstract and paper link	9	0	0	0
112	Twitter	English	Kinesiotaping to relief pain, increase grip strength and function in people with epicondylitis	Yes	No	Partial	No	No	No	Facilitated Information	Text and paper link	9	0	0	0
113	Twitter	English	Stretching for hip pain	No	not applicable	not applicable	Yes	Yes	No	Self-promotion	Text and website link	155	1	0	0
114	Twitter	English	Exercise to reduce shoulder pain, increase strength and mobility	No	not applicable	not applicable	No	No	No	Simple dissemination	Text and website link	155	0	0	0
115	Twitter	English	Rehabilitation for hamstring tendon avulsion	Yes	No	Accurate	No	No	No	Simple dissemination	Images of the paper and paper link	46	0	0	0
116	Twitter	English	Strengthening of groin muscles to treat groin strains	Yes	No	Partial	No	No	No	Facilitated Information	Infographic and paper link	91	0	0	0
117	Twitter	English	Strengthening for knee osteoarthritis	Yes	No	Partial	No	No	No	Facilitated Information	Infographic and paper link	91	2	0	0
118	Twitter	English	Return to sport after anterior cruciate ligament injury	Yes	No	Partial	No	No	No	Facilitated Information	Infographic and paper link	91	1	1	1
119	Twitter	English	Stretching to reduce tension in neck and back muscles	No	not applicable	not applicable	Yes	Yes	Yes	Self-promotion	Text	186	0	0	0
120	Twitter	English	Physiotherapy to treat athletes after injuries and post-surgery	No	not applicable	not applicable	Yes	Yes	Yes	Self-promotion	Text and website link	53	0	0	0
121	Twitter	English	Kinesiotaping to relief pain	No	not applicable	not applicable	Yes	Yes	No	Self-promotion	Text, figure and website link	3	0	0	0
122	Twitter	English	Constrained-induced movement to increase muscle strength and motor imagery to improve control after stroke	No	not applicable	not applicable	Yes	No	Yes	Simple dissemination with conflict	Text and figure	0	0	0	0
123	Twitter	English	Exercise for shoulder instability	No	not applicable	not applicable	Yes	Yes	No	Self-promotion	Text and video	93	3	0	0
124	Twitter	English	Exercise and compression with bandage for lymphedema	No	not applicable	not applicable	Yes	Yes	No	Self-promotion	Text and video	17	0	0	0
125	Twitter	English	Grip strengthening for muscle weakness after nerve compression	No	not applicable	not applicable	Yes	Yes	No	Self-promotion	Text and video	17	0	0	0
126	Twitter	English	Overhead exercise for shouder rehabilitation	No	not applicable	not applicable	Yes	Yes	No	Self-promotion	Text and video	17	1	0	0
127	Twitter	English	Virtual reality games to reduce pain	No	not applicable	not applicable	Yes	No	Yes	Self-promotion	Text and website link	1976	0	0	0
128	Twitter	English	Virtual reality to manage pain	No	not applicable	not applicable	Yes	No	Yes	Simple dissemination with conflict	Text and website link	245	3	0	1
129	Twitter	English	Exercise, manual therapy and education to treat pain	No	not applicable	not applicable	Yes	No	Yes	Simple dissemination with conflict	Text and website link	245	1	0	0
130	Twitter	English	Telerehabilitation for rehabilitation of physical disabilities	Yes	No	Accurate	No	No	No	Simple dissemination	Text and website link	340	0	0	0
131	Twitter	English	Acupuncture, exercise, thermotherapy and massage therapy for shoulder pain	No	not applicable	not applicable	Yes	Yes	No	Self-promotion	Text, infographic and website link	11	0	0	0
132	Twitter	English	Vestibular rehabilitation to improve balance	No	not applicable	not applicable	Yes	Yes	No	Self-promotion	Text and website link	11	1	0	0
133	Twitter	English	Exercise, aquatic therapy, electrotherapy and manual therapy for arthritis	No	not applicable	not applicable	Yes	Yes	No	Self-promotion	Text, infographic and website link	11	0	0	0
134	Twitter	English	Physiotherapy to improve movment and flexibility in children with cerebral palsy	No	not applicable	not applicable	No	No	No	Simple dissemination	Text and infographic	564	12	0	4
135	Twitter	English	Warm-up to prevent injuries during sport practice	No	not applicable	not applicable	No	No	No	Simple dissemination	Text and infographic	13	0	0	0
136	Twitter	English	Exercise for rehabilitation after hamstring injury	No	not applicable	not applicable	No	No	No	Simple dissemination	Text and website link	2	0	0	0
137	Twitter	English	Aerobic exercise for athlete rehabilitation	No	not applicable	not applicable	No	No	No	Simple dissemination	Text and video	1059	0	0	0
138	Twitter	English	Game therapy to improve balance	No	not applicable	not applicable	Yes	No	Yes	Self-promotion	Text and video	26	1	0	2
139	Twitter	English	Physiotherapy to prevent complications during cancer treatment	No	not applicable	not applicable	Yes	No	Yes	Self-promotion	Text and infographic	735	0	0	0
140	Twitter	English	Stretching and myofascial release to prevent sport injuries	No	not applicable	not applicable	Yes	No	Yes	Simple dissemination with conflict	Text and figure	3588	1	0	0
141	Twitter	English	Myofascial release to relax muscles and improve posture	No	not applicable	not applicable	Yes	No	Yes	Simple dissemination with conflict	Text and figure	3588	3	0	0
142	Twitter	English	Exercise for health promotion	No	not applicable	not applicable	No	No	No	Simple dissemination	Text	54	0	0	0
143	Twitter	English	Physiotherapy to manage pain in knee and hip osteoathritis	No	not applicable	not applicable	Yes	Yes	No	Self-promotion	Text and website link	245	0	0	0
144	Twitter	English	Aquatic therapy to increase strength and mobility after tibia fracture	No	not applicable	not applicable	No	No	No	Simple dissemination	Text and infographic	33	2	0	0
145	Twitter	English	Exercise to decrease pain and improve function	Yes	No	Partial	No	No	No	Facilitated Information	Text and paper link	147	0	0	0
146	Twitter	English	Physiotherapy to prevent loss of mobility	No	not applicable	not applicable	Yes	Yes	Yes	Self-promotion	Text	3755	1	0	1
147	Twitter	English	Electrotherapy and dry needling for shoulder pain	No	not applicable	not applicable	Yes	Yes	No	Self-promotion	Text and video	46	4	0	2
148	Twitter	English	Stretching to prevent stiffness and low back pain	No	not applicable	not applicable	No	No	No	Simple dissemination	Text and infographic	96	3	0	1
149	Twitter	English	Stretching for neck pain	No	not applicable	not applicable	Yes	Yes	Yes	Self-promotion	Text and infographic	73	1	0	0
150	Twitter	English	Physiotherapy for fall prevention	No	not applicable	not applicable	Yes	Yes	Yes	Self-promotion	Text	2	0	0	0
151	Twitter	English	Gait retraning to improve mobility, muscle strength, balance and endurance	No	not applicable	not applicable	Yes	No	Yes	Simple dissemination with conflict	Text	2	0	0	0
152	Twitter	English	Aquatic therapy to treat fibromyalgia, arthritis, Parkinson disease and chronic pain	No	not applicable	not applicable	Yes	Yes	Yes	Self-promotion	Text and website link	600	4	0	2
153	Twitter	English	Aquatic therapy for knee osteoarthritis	No	not applicable	not applicable	Yes	Yes	Yes	Self-promotion	Text and website link	600	3	0	1
154	Twitter	English	Aquatic therapy for rehabilitation of different conditions	No	not applicable	not applicable	Yes	Yes	Yes	Self-promotion	Text and website link	600	2	0	2
155	Twitter	English	Electrotherapy for urinary incontinence	No	not applicable	not applicable	Yes	Yes	Yes	Self-promotion	Text and website link	1038	1	0	2
156	Twitter	English	Electrotherapy to improve recovery after sport practice	No	not applicable	not applicable	Yes	Yes	Yes	Self-promotion	Text and website link	1038	1	0	1
157	Twitter	English	Biomechanical changes to prevent injuries	No	not applicable	not applicable	Yes	No	Yes	Simple dissemination with conflict	Text and video	881	0	0	0
158	Twitter	English	Exercise and chiropractic to treat different conditions	No	not applicable	not applicable	No	No	No	Simple dissemination	Text and figure	63	0	0	0
159	Twitter	English	Physiotherapy for older people	No	not applicable	not applicable	Yes	Yes	Yes	Self-promotion	Text and website link	18	0	0	0
160	Twitter	English	Exercise for low back pain	No	not applicable	not applicable	Yes	Yes	Yes	Self-promotion	Text and website link	206	0	0	0
161	Twitter	English	Physiotherapy after tibial osteotomy to improve gait, strength and mobility	No	not applicable	not applicable	Yes	Yes	No	Self-promotion	Text, figure and website link	121	0	0	0
162	Twitter	English	Stretching to prevent low back pain	No	not applicable	not applicable	Yes	Yes	No	Self-promotion	Text, figure and website link	121	1	0	0
163	Twitter	English	Post-operative rehabilitation after knee replacement	No	not applicable	not applicable	Yes	No	Yes	Simple dissemination with conflict	Text and website link	264	0	0	0
164	Twitter	English	Exercise to improve mobility after stroke	No	not applicable	not applicable	Yes	No	Yes	Self-promotion	Text and website link	901	0	0	0
165	Twitter	English	Physiotherapy to treat compensations and pain	No	not applicable	not applicable	Yes	Yes	No	Self-promotion	Text, figure and website link	80	0	0	0
166	Twitter	English	Virtual reality to improve mobility, function and balance in musculoskeletal disorders	Yes	No	Partial	No	No	No	Facilitated Information	Text and paper link	506	2	0	2
167	Twitter	English	Vestibular rehabilitation to treat dizziness and balance conditions	No	not applicable	not applicable	Yes	Yes	No	Self-promotion	Text and figure	72	1	0	0
168	Twitter	English	Education for low back pain	Yes	No	Accurate	Yes	No	Yes	Simple dissemination with conflict	Paper link and image of title page	212	0	0	0
169	Twitter	English	Exercise to improve strength, endurance, flexibility and balance in people with Parkinson disease	No	not applicable	not applicable	Yes	Yes	No	Self-promotion	Text and figure	35	2	0	1
170	Twitter	English	Exercise to increase leg strength, mobility and gait after knee replacement	No	not applicable	not applicable	Yes	Yes	No	Self-promotion	Text and figure	35	1	0	1
171	Twitter	Portuguese	Exercise for lateral collateral ligament injury	No	not applicable	not applicable	Yes	No	Yes	Self-promotion	Text and video	40	4	0	0
172	Twitter	Portuguese	Exercise for tibia fracture	No	not applicable	not applicable	No	No	No	Simple dissemination	Text and video	960	2	1	0
173	Twitter	Portuguese	Physiotherapy for urinary incontinence	No	not applicable	not applicable	No	No	No	Simple dissemination	Text and infographic	580	0	0	0
174	Twitter	Portuguese	Manual therapy for chronic cervical pain	Yes	No	Partial	No	No	No	Simple dissemination	Text, paper link and image of title	15	0	0	0
175	Twitter	Portuguese	Exercise for shoulder disorder	Yes	No	Partial	No	No	No	Simple dissemination	Text and image of title	15	1	0	0
176	Twitter	Portuguese	Exercise to treat Achilles tendinopathy	Yes	No	Accurate	No	No	No	Facilitated Information	Text and image of title	15	1	0	0
177	Twitter	Portuguese	Neural mobilization to symptoms in patients with lumbar radiculopathy	Yes	No	Partial	No	No	No	Facilitated Information	Text and image of title	15	0	0	0
178	Twitter	Portuguese	Vestibular rehabilitation to prevent low back pain	Yes	No	Accurate	No	No	No	Simple dissemination	Paper link	0	0	0	0
179	Twitter	Portuguese	Global posture reeducation to improve posture	No	not applicable	not applicable	Yes	Yes	Yes	Self-promotion	Text, figure and website link	15	1	0	0
180	Twitter	Portuguese	Exercise to improve thoracic mobility	No	not applicable	not applicable	No	No	No	Simple dissemination	Text and video	2	1	0	0
181	Twitter	Portuguese	Exercise to prevent injury	No	not applicable	not applicable	No	No	No	Simple dissemination	Text and video	2	1	0	0
182	Twitter	Portuguese	Biomechanic change to prevent running injury	No	not applicable	not applicable	Yes	No	Yes	Simple dissemination with conflict	Text and website link	98	0	0	0
183	Twitter	Portuguese	Physiotherapy to keep function and prevent complications during cancer treatment	No	not applicable	not applicable	Yes	Yes	No	Self-promotion	Text and website link	16	1	0	0
184	Twitter	Portuguese	Strength training for foot muscles to prevent and treat plantar fasciitis	Yes	No	Accurate	No	No	No	Simple dissemination	Text and paper image	161	1	0	0
185	Twitter	Portuguese	Strengthening to treat tendinopathy	No	not applicable	not applicable	No	No	No	Simple dissemination	Text and video	161	1	0	0
186	Twitter	Portuguese	Strength training for foot muscles to treat plantar fasciitis	No	not applicable	not applicable	No	No	No	Simple dissemination	Text and figure	161	1	1	0
187	Twitter	Portuguese	Return to sport after COVID	No	not applicable	not applicable	Yes	No	Yes	Self-promotion	Text and website link	9401	0	0	0
188	Twitter	Portuguese	Crochet technique to reduce pain	No	not applicable	not applicable	Yes	No	Yes	Self-promotion	Text and website link	9401	0	0	0
189	Twitter	Portuguese	Gait retraining to improve walking	No	not applicable	not applicable	Yes	No	Yes	Self-promotion	Text and website link	9401	0	0	0
190	Twitter	Portuguese	Laboral gymnastic to prevent work-related injuries	Yes	not assessed	not assessed	No	No	No	Simple dissemination	Text and paper link	2172	0	0	0
191	Twitter	Portuguese	Backward gait retraining to treat people with knee injuries	No	not applicable	not applicable	No	No	No	Simple dissemination	Text and website link	1112	0	0	0
192	Twitter	Portuguese	Strengthening for recovery after lumbar surgery	No	not applicable	not applicable	No	No	No	Simple dissemination	Video	32	0	0	0
193	Twitter	Portuguese	Pilates to reduce pain during pregnancy	No	not applicable	not applicable	Yes	No	Yes	Simple dissemination with conflict	Text	241	2	0	2
194	Twitter	Portuguese	Thermotherapy to manage pain	No	not applicable	not applicable	No	No	No	Simple dissemination	Infographic	44	2	0	0
195	Twitter	Portuguese	Exercise to improve function in people with Parkinson disease	No	not applicable	not applicable	Yes	No	Yes	Simple dissemination with conflict	Text and figure	1225	1	0	0
196	Twitter	Portuguese	Exercise to reduce pain and improve function in people with knee osteoarthritis	No	not applicable	not applicable	Yes	Yes	No	Self-promotion	Text and figure	3	0	0	0
197	Twitter	Portuguese	Therapeutic ultrasound for ankle sprain	No	not applicable	not applicable	Yes	Yes	No	Self-promotion	Text and figure	3	0	0	0
198	Twitter	Portuguese	Hippotherapy for rehabilitation of different conditions	No	not applicable	not applicable	No	No	No	Simple dissemination	Text and figure	562	1	0	0
199	Twitter	Portuguese	Postural control training to improve balance, flexibility and muscle strengh	No	not applicable	not applicable	No	No	No	Simple dissemination	Text and website link	3	0	0	0
200	Twitter	Portuguese	Rehabilitation for people with long COVID	No	not applicable	not applicable	No	No	No	Simple dissemination	Text and infographic	43	1	0	0
201	Twitter	Portuguese	Exercise for anterior cruciate ligament reconstruction	No	not applicable	not applicable	Yes	Yes	No	Self-promotion	Text and website link	147	0	0	0
202	Twitter	Portuguese	Exercise to reduce pain in thoracic spine	No	not applicable	not applicable	No	No	No	Simple dissemination	Text and video	84	1	0	0
203	Twitter	Portuguese	Therapeutic ultrasound for skin injuries	No	not applicable	not applicable	No	No	No	Simple dissemination	Text	8576	0	0	0
204	Twitter	Portuguese	Therapeutic ultrasound for muscle injuries	No	not applicable	not applicable	No	No	No	Simple dissemination	Text	8576	0	0	0
205	Twitter	Portuguese	Global posture reeducation to treat spine disorders	No	not applicable	not applicable	Yes	No	Yes	Simple dissemination with conflict	Text and figure	39	0	0	0
206	Twitter	Portuguese	Cupping therapy to increase blood flow	No	not applicable	not applicable	Yes	Yes	Yes	Self-promotion	Infographic	74	0	0	0
207	Twitter	Portuguese	Myofascial release to reduce pain	No	not applicable	not applicable	Yes	Yes	No	Self-promotion	Infographic	74	0	0	0
208	Twitter	Portuguese	Auriculotherapy for rehabilitation od different disorders	No	not applicable	not applicable	Yes	Yes	No	Self-promotion	Infographic	74	0	0	0
209	Twitter	Portuguese	Physiotherapy for muscle injuries	No	not applicable	not applicable	Yes	No	Yes	Simple dissemination with conflict	Text and website link	12800	1	0	0
210	Twitter	Portuguese	Aquatic therapy to reduce spine pain	No	not applicable	not applicable	No	No	No	Simple dissemination	Text and website link	753	0	0	0
211	Twitter	Portuguese	Exercise and lymphatic drainage to treat oncologic patients	No	not applicable	not applicable	No	No	No	Simple dissemination	Text and website link	753	0	0	0
212	Twitter	Portuguese	Exercise after COVID	No	not applicable	not applicable	No	No	No	Simple dissemination	Text and website link	56	3	0	1
213	Twitter	Portuguese	Strengthening of respiratory muscles for COVID recovery	No	not applicable	not applicable	Yes	Yes	No	Self-promotion	Text and website link	54	0	0	0
214	Twitter	Portuguese	Game therapy for rehabilitation of different conditions	No	not applicable	not applicable	No	No	No	Simple dissemination	Infographic	42	0	0	0
215	Twitter	Portuguese	Global posture reeducation to reduce pain	No	not applicable	not applicable	Yes	Yes	No	Self-promotion	Text and figure	732	0	0	0
216	Twitter	Portuguese	Vestibular rehabilitation for elderly people	Yes	No	Accurate	No	No	No	Simple dissemination	Text and website link	517	0	0	0
217	Twitter	Portuguese	Exercise to improve mobility of lowe limbs	No	not applicable	not applicable	Yes	No	Yes	Simple dissemination with conflict	Text and video	5	0	0	0
218	Twitter	Portuguese	Ozone therapy to reduce knee pain	No	not applicable	not applicable	No	No	No	Simple dissemination	Text and video	6	0	0	0
219	Twitter	Portuguese	Ozone therapy to prevent injury and support recovery after sport practice	No	not applicable	not applicable	No	No	No	Simple dissemination	Text and figure	6	0	0	0
220	Twitter	Portuguese	Crochet technique to reduce shoulder pain	No	not applicable	not applicable	Yes	Yes	Yes	Self-promotion	Text and video	692	0	0	0
221	Twitter	Portuguese	Stretching to increase mobility of cervical and thoracic spine	No	not applicable	not applicable	Yes	No	Yes	Simple dissemination with conflict	Text and video	692	1	0	0
222	Twitter	Portuguese	Stretching, strengthening and massage for elbow pain	No	not applicable	not applicable	Yes	No	Yes	Simple dissemination with conflict	Text and video	692	0	0	0
223	Twitter	Portuguese	Physiotherapy for people with sequels of COVID	No	not applicable	not applicable	No	No	No	Simple dissemination	Text and website link	3196	0	0	0
224	Twitter	Portuguese	Kinesiotaping for rehabilitation of different disorders	No	not applicable	not applicable	Yes	Yes	No	Self-promotion	Text and website link	1033	0	0	0
225	Twitter	Portuguese	Strengthening for knee osteoarthritis	No	not applicable	not applicable	Yes	No	Yes	Simple dissemination with conflict	Text	10	1	1	0
226	Twitter	Portuguese	Thermotherapy for acute injuries	No	not applicable	not applicable	Yes	No	Yes	Simple dissemination with conflict	Text	1	0	0	0
227	Twitter	Portuguese	Exercise to prevent injuries in football athletes	Yes	No	Accurate	No	No	No	Facilitated Information	Text, infographic and website link	1124	3	2	1
228	Twitter	Portuguese	Education to reduce musculoskeletal pain	Yes	No	Partial	No	No	No	Facilitated Information	Text, infographic and website link	1124	5	0	3
229	Twitter	Portuguese	Strengthening during pregnancy to prevent pelvic disorders	Yes	No	Partial	No	No	No	Facilitated Information	Text and website link	1124	2	0	0
230	Twitter	Portuguese	Aerobic exercises for rehabilitation of people after smoking cessation	Yes	No	Partial	No	No	No	Facilitated Information	Text, infographic and website link	1124	2	0	1
231	Twitter	Portuguese	Return to sport after ankle sprain	Yes	No	Accurate	Yes	No	Yes	Self-promotion	Text, infographic and website link	348	0	0	0
232	Twitter	Portuguese	Kinesiotaping for ankle function	Yes	No	Accurate	No	No	No	Facilitated Information	Text, infographic and paper link	45	2	0	0
233	Twitter	Portuguese	Exercise for chronic pain	No	not applicable	not applicable	No	No	No	Simple dissemination	Text and figure	45	2	0	0
234	Twitter	Portuguese	Rehabilitation to improve mobility, fitness and muscle capacity after COVID	No	not applicable	not applicable	Yes	No	Yes	Simple dissemination with conflict	Text and website link	216	0	0	0
235	Twitter	Portuguese	Physiotherapy for people with sequels of COVID	No	not applicable	not applicable	Yes	No	Yes	Simple dissemination with conflict	Text and website link	216	0	0	0
236	Twitter	Portuguese	Physiotherapy to prevent long COVID	Yes	No	Partial	Yes	No	Yes	Facilitated Information with conflict	Text and website link	216	0	2	0
237	Twitter	Portuguese	Oxygen therapy to treat patients with COVID	No	not applicable	not applicable	Yes	No	Yes	Simple dissemination with conflict	Text and website link	216	1	0	1
238	Twitter	Portuguese	Pediatric physiotherapy to improve functional capacity	No	not applicable	not applicable	Yes	No	Yes	Self-promotion	Text and website link	21	0	0	0
239	Twitter	Portuguese	Exercises to reduce muscle pain and increase flexibility	No	not applicable	not applicable	Yes	No	Yes	Simple dissemination with conflict	Text	21	0	0	0
240	Twitter	Portuguese	Physiotherapy to improve functional capacity in people with neurological conditions	No	not applicable	not applicable	Yes	Yes	Yes	Self-promotion	Text	21	0	0	0
241	Twitter	Portuguese	Global posture reeducation to reduce pain	No	not applicable	not applicable	Yes	Yes	Yes	Self-promotion	Text	21	0	0	0
242	Twitter	Portuguese	Insoles to reduce pain during walking	No	not applicable	not applicable	Yes	Yes	Yes	Self-promotion	Text, infographic and website link	4	0	0	0
243	Twitter	Portuguese	Pulmonary rehabilitation to treat people with COVID, COPD and asthma	Yes	No	Accurate	No	No	No	Simple dissemination	Text and infographic	787	1	0	0
244	Twitter	Portuguese	Lymphatic drainage to prevent infections	No	not applicable	not applicable	Yes	No	Yes	Simple dissemination with conflict	Text and figure	24	1	0	1
245	Twitter	Portuguese	Pilates to prevent wrist injuries	No	not applicable	not applicable	Yes	No	Yes	Simple dissemination with conflict	Text and figure	1332	0	0	0
246	Twitter	Portuguese	Dry needling to reduce pain	No	not applicable	not applicable	Yes	No	Yes	Simple dissemination with conflict	Text and figure	1332	0	0	0
247	Twitter	Portuguese	Cupping therapy to treat different conditions	No	not applicable	not applicable	No	No	No	Simple dissemination	Text and infographic	22	1	0	1
248	Twitter	Portuguese	Cupping therapy to increase blood flow	No	not applicable	not applicable	No	No	No	Simple dissemination	Text and infographic	22	2	0	2
249	Twitter	Portuguese	Physiotherapy for people with sequels of COVID	No	not applicable	not applicable	No	No	No	Simple dissemination	Text and video	11300	3	0	2
250	Twitter	Portuguese	Plyometric exercises for knee rehabilitation	No	not applicable	not applicable	No	No	No	Simple dissemination	Text and video	27	1	0	0
251	Twitter	Portuguese	Cardiopulmonary rehabilitation for patients with chronic diseases	No	not applicable	not applicable	Yes	Yes	No	Self-promotion	Text and website link	1244	0	0	0
252	Twitter	Portuguese	Kinesiotaping for rehabilitation of sport injuries	No	not applicable	not applicable	No	No	No	Simple dissemination	Text and website link	314	0	0	0
253	Twitter	Portuguese	Phonophoresis to reduce pain and increase function in people with knee osteoarthritis	Yes	No	Accurate	No	No	No	Simple dissemination	Text, link paper and title page image	145	0	0	0
254	Twitter	Portuguese	Iontophoresis to treat skin injuries	Yes	No	Accurate	No	No	No	Simple dissemination	Text, link paper and title page image	145	0	0	0
255	Twitter	Portuguese	Aerobic and strength exercises to treat elderly people with dementia	No	not applicable	not applicable	No	No	No	Simple dissemination	Text and website link	24	0	0	0
256	Twitter	Portuguese	Exercise to manage chronic pain	No	not applicable	not applicable	No	No	No	Simple dissemination	Text and figure	45	2	0	0
257	Twitter	Portuguese	Strengthening, stretching and joint mobilization to treat muscle and ligament injuries	No	not applicable	not applicable	Yes	No	Yes	Self-promotion	Text and website link	21	0	0	0
258	Twitter	Portuguese	Strengthening to manage muscle weakness	Yes	No	Accurate	No	No	No	Simple dissemination	Image of title paper	44	0	0	0
259	Twitter	Portuguese	Manual therapy, exercise and magnetotherapy to treat plantar fasciitis	No	not applicable	not applicable	Yes	No	Yes	Simple dissemination with conflict	Text	1	0	0	0
260	Twitter	Portuguese	Physiotherapy to prevent ergonomic risks	No	not applicable	not applicable	No	No	No	Simple dissemination	Text and website link	12800	2	0	1
261	Twitter	Portuguese	Osteopathy to improve quality of life in elderly people	No	not applicable	not applicable	No	No	No	Simple dissemination	Text and website link	12800	1	0	2
262	Twitter	Portuguese	Physiotherapy to manage musculoskeletal pain in athletes	No	not applicable	not applicable	No	No	No	Simple dissemination	Text and infographic	763	3	0	0
263	Twitter	Portuguese	Exercise to treat acute pain	Yes	No	Accurate	No	No	No	Facilitated Information	Text and infographic	45	0	0	0
264	Twitter	Portuguese	Physiotherapy for people after knee arthroscopy	Yes	No	Accurate	No	No	No	Facilitated Information	Text and website link	109	0	0	0
265	Twitter	Portuguese	Physiotherapy for people with sequels of COVID	No	not applicable	not applicable	No	No	No	Simple dissemination	Text and infographic	117	2	0	1
266	Twitter	Portuguese	Proprioception to prevent sport injuries	No	not applicable	not applicable	Yes	No	Yes	Simple dissemination with conflict	Text and video	40	15	2	8
267	Twitter	Portuguese	Virtual reality to treat people with neurological conditions	No	not applicable	not applicable	No	No	No	Simple dissemination	Text and website link	71	8	0	8
268	Twitter	Portuguese	Lymphatic drainage to prevent oedema	No	not applicable	not applicable	Yes	No	Yes	Simple dissemination with conflict	Text and video	39	0	0	0
269	Twitter	Portuguese	Physiotherapy to treat people with COVID	No	not applicable	not applicable	No	No	No	Simple dissemination	Text and website link	1517	1	0	1
270	Twitter	Portuguese	Electrotherapy and exercise to reduce pain in people with lumbar herniated disc	No	not applicable	not applicable	No	No	No	Simple dissemination	Text and video	2	0	0	0
271	Twitter	Portuguese	Education to manage chronic pain	Yes	No	Accurate	No	No	No	Simple dissemination	Text and paper link	117	2	0	0
272	Instagram	Portuguese	Laser therapy for post-surgery, chronic pain and patients with musculoskeletal and neurological conditions	No	not applicable	not applicable	Yes	Yes	No	Self-promotion	Text and figure	265	33	6	N/A
273	Instagram	Portuguese	Stretching for muscle shorten related to club foot	No	not applicable	not applicable	No	No	No	Simple dissemination	Text and figure	485	6	0	N/A
274	Instagram	Portuguese	Exercise and electrotherapy for shoulder adhesive capsulitis	Yes	No	Partial	Yes	No	Yes	Facilitated Information with conflict	Text and figure	2925	60	0	N/A
275	Instagram	Portuguese	Manual therapy, mobility exercises and electrotherapy for carpal tunnel syndrome	No	not applicable	not applicable	No	No	No	Simple dissemination	Text and figure	298	11	1	N/A
276	Instagram	Portuguese	Exercise for people with knee arthritis and after total knee arthroplasty	No	not applicable	not applicable	No	No	No	Simple dissemination	Text, figure and video	1299	31	0	N/A
277	Instagram	Portuguese	Exercise for people with lumbar herniated disk	No	not applicable	not applicable	Yes	Yes	No	Self-promotion	Text and video	284	38	0	N/A
278	Instagram	Portuguese	Global posture reeducation to corretct posture, increase muscle strengh and flexibility	No	not applicable	not applicable	Yes	Yes	No	Self-promotion	Text and figure	3949	17	2	N/A
279	Instagram	Portuguese	Pilates to reduce spine pain, increase muscle strength and correct posture	No	not applicable	not applicable	Yes	Yes	No	Self-promotion	Text and figure	204	13	0	N/A
280	Instagram	Portuguese	Chiropractic to improve sport performance and prevent injuries	No	not applicable	not applicable	Yes	Yes	Yes	Self-promotion	Text and figure	2125	18	1	N/A
281	Instagram	Portuguese	Joint mobilization, myofascial release, stretching and cryotherapy to decrease pain in people with epicondilitis	No	not applicable	not applicable	Yes	Yes	No	Self-promotion	Text and infographic	1746	18	0	N/A
282	Instagram	Portuguese	Strengthening for weak muscles in musculoskeletal conditions	No	not applicable	not applicable	Yes	Yes	No	Self-promotion	Text and figure	207	16	0	N/A
283	Instagram	Portuguese	Cryotherapy is not indicated for pain or oedema reduction	No	not applicable	not applicable	No	No	No	Simple dissemination	Text and figure	817	79	4	N/A
284	Instagram	Portuguese	Strengthening for diastasis	No	not applicable	not applicable	No	No	No	Simple dissemination	Text, figure and video	1064	59	6	N/A
285	Instagram	Portuguese	Osteopathy to reduce low back pain	No	not applicable	not applicable	No	No	No	Simple dissemination	Text and figure	1064	16	0	N/A
286	Instagram	Portuguese	Auriculotherapy for oncologic patients	Yes	No	Partial	No	No	No	Facilitated Information	Text and image of title paper	267	6	0	N/A
287	Instagram	Portuguese	Motor control exercises for knee post-surgery	No	not applicable	not applicable	Yes	Yes	Yes	Self-promotion	Text and video	1169	274	2	N/A
288	Instagram	Portuguese	Postural and respiratory exercises to increase strength and joint mobility in patients with ankylosing spondylitis	No	not applicable	not applicable	Yes	Yes	No	Self-promotion	Text and video	2411	103	0	N/A
289	Instagram	Portuguese	Thoracic manipulation for neck pain	Yes	No	Partial	Yes	Yes	Yes	Simple dissemination with conflict	Text and image of title page	2218	16	0	N/A
290	Instagram	Portuguese	Cervical manipulation to increase mobility and function	No	not applicable	not applicable	Yes	No	Yes	Simple dissemination with conflict	Text and video	2217	21	2	N/A
291	Instagram	Portuguese	Thermotherapy for acute injuries	No	not applicable	not applicable	Yes	Yes	No	Self-promotion	Text and figure	1588	50	0	N/A
292	Instagram	Portuguese	Massage therapy to decrease pain and cutaneous sensibilization in amputated patients	No	not applicable	not applicable	Yes	Yes	Yes	Self-promotion	Text and video	8013	168	6	N/A
293	Instagram	Portuguese	Pilates to decrease pain, reduce kinesiophobia, increase function, flexibility and strength in people with low back pain	Yes	No	Partial	No	No	No	Facilitated Information	Text and figure	335	4	0	N/A
294	Instagram	Portuguese	Strengthening for rehabilitation after ACL reconstruction	No	not applicable	not applicable	No	No	No	Simple dissemination	Text and figure	1345	28	2	N/A
295	Instagram	Portuguese	Strengthening, stretching and mobility exercises for low back pain	No	not applicable	not applicable	No	No	No	Simple dissemination	Text and figure	4583	25	1	N/A
296	Instagram	Portuguese	Pilates to increase muscle strengh and proprioception in amputated patients	No	not applicable	not applicable	Yes	Yes	Yes	Self-promotion	Text and video	745	30	0	N/A
297	Instagram	Portuguese	Acupuncture for low back pain	Yes	No	Accurate	No	No	No	Facilitated Information	Text and infographic	106	8	0	N/A
298	Instagram	Portuguese	Cupping therapy to improve blood flow	No	not applicable	not applicable	Yes	Yes	No	Self-promotion	Text and figure	3648	8	0	N/A
299	Instagram	Portuguese	Lymphatic drainage and electrotherapy for post-surgery	No	not applicable	not applicable	Yes	Yes	Yes	Self-promotion	Text and figure	727	9	0	N/A
300	Instagram	Portuguese	Global posture reeducation to correct posture, decrease pain and increase balance	No	not applicable	not applicable	No	No	No	Simple dissemination	Text and figure	1447	24	1	N/A
301	Instagram	Portuguese	Early physiotherapy for post-surgery phase of knee replacement	No	not applicable	not applicable	No	No	No	Simple dissemination	Text and video	1907	85	0	N/A
302	Instagram	Portuguese	Osteopathy, choropractic and heat to reduce acute low back pain	No	not applicable	not applicable	Yes	No	Yes	Simple dissemination with conflict	Text and figure	648	10	0	N/A
303	Instagram	Portuguese	Physiotherapy for fractures	No	not applicable	not applicable	Yes	Yes	Yes	Self-promotion	Text and figure	2024	54	4	N/A
304	Instagram	Portuguese	Physiotherapy to improve mobility and flexibility in patients with ankylosing spondylitis	No	not applicable	not applicable	No	No	No	Simple dissemination	Text and figure	1936	5	0	N/A
305	Instagram	Portuguese	Aquatic therapy for people with neurological conditions	No	not applicable	not applicable	No	No	No	Simple dissemination	Text and video	865	29	4	N/A
306	Instagram	Portuguese	Laser therapy for carpal tunnel syndrome	No	not applicable	not applicable	Yes	Yes	No	Self-promotion	Text and figure	1082	14	0	N/A
307	Instagram	Portuguese	Exercise to improve function after stroke	No	not applicable	not applicable	No	No	No	Simple dissemination	Text and figure	1549	8	0	N/A
308	Instagram	Portuguese	Respiratory training for COVID syndrome	No	not applicable	not applicable	Yes	Yes	No	Self-promotion	Text and figure	2110	10	0	N/A
309	Instagram	Portuguese	Mobility exercises for meniscal post-surgery	No	not applicable	not applicable	Yes	Yes	No	Self-promotion	Text and video	345	20	0	N/A
310	Instagram	Portuguese	Laser therapy for paresthesia, cicatrization, oedema and pain	No	not applicable	not applicable	Yes	Yes	Yes	Self-promotion	Text and figure	1035	4	0	N/A
311	Instagram	Portuguese	Aquatic therapy to reduce muscle pain	No	not applicable	not applicable	Yes	Yes	No	Self-promotion	Text and figure	4893	6	0	N/A
312	Instagram	Portuguese	Exercises to relief symptoms, avoid sequels and prevent complications related to COVID	No	not applicable	not applicable	Yes	Yes	No	Self-promotion	Text and figure	2376	28	0	N/A
313	Instagram	Portuguese	Pilates to recovery patients after COVID	No	not applicable	not applicable	No	No	No	Simple dissemination	Text and video	498	10	0	N/A
314	Instagram	Portuguese	Acupuncture, cupping therapy and electrotherapy to reduce pain in patients with lumbar herniated disc	No	not applicable	not applicable	Yes	Yes	No	Self-promotion	Text and figure	303	22	6	N/A
315	Instagram	Portuguese	Exercise to increase mobility of the ankle	No	not applicable	not applicable	No	No	No	Simple dissemination	Text and video	484	14	0	N/A
316	Instagram	Portuguese	Pelvic exercises to prevent disfunctions	No	not applicable	not applicable	No	No	No	Simple dissemination	Text and figure	860	7	0	N/A
317	Instagram	Portuguese	Dry needling to reduce muscle pain	No	not applicable	not applicable	Yes	Yes	No	Self-promotion	Text and figure	1252	4	0	N/A
318	Instagram	Portuguese	Cupping therapy to reduce pain and increase blood flow	No	not applicable	not applicable	Yes	Yes	No	Self-promotion	Text and figure	1252	6	1	N/A
319	Instagram	Portuguese	Strengthening for hamstring injury	No	not applicable	not applicable	No	No	No	Simple dissemination	Text and video	1545	56	0	N/A
320	Instagram	Portuguese	Dry needling to reduce pain	No	not applicable	not applicable	Yes	Yes	No	Self-promotion	Text and figure	369	30	2	N/A
321	Instagram	Portuguese	Pendular exercises for shoulder pain	No	not applicable	not applicable	Yes	Yes	No	Self-promotion	Text and video	133	16	0	N/A
322	Instagram	Portuguese	Global posture reeducation for people with postural alterations and pain	No	not applicable	not applicable	Yes	Yes	No	Self-promotion	Text and figure	39400	16	0	N/A
323	Instagram	Portuguese	Rehabilitation for patients after COVID	No	not applicable	not applicable	Yes	Yes	No	Self-promotion	Text and video	2660	35	2	N/A
324	Instagram	Portuguese	Dry needling to reduce shoulder pain	Yes	No	Accurate	Yes	No	Yes	Facilitated Information with conflict	Text and figure	2924	87	1	N/A
325	Instagram	Portuguese	Manual therapy to treat people after arm fracture	No	not applicable	not applicable	No	No	No	Simple dissemination	Text and video	1052	13	2	N/A
326	Instagram	Portuguese	Pilates to reduce pain, improve function, balance, fitness, flexibility, strength and quality of life in elderly people	No	not applicable	not applicable	No	No	No	Simple dissemination	Text and infographic	494	9	1	N/A
327	Instagram	Portuguese	Manual therapy for temporomandibular disorders	Yes	No	Partial	No	Yes	No	Simple dissemination	Text	421	23	0	N/A
328	Instagram	Portuguese	Exercise for chronic pain	Yes	No	Partial	Yes	No	Yes	Facilitated Information with conflict	Text and figure	14332	31	0	N/A
329	Instagram	Portuguese	Physiotherapy to reduce pain, increase flexibility and strength in people with thoracic pain	No	not applicable	not applicable	No	No	No	Simple dissemination	Text and infographic	378	7	0	N/A
330	Instagram	Portuguese	Exercise for people with neurologic conditions	No	not applicable	not applicable	No	No	No	Simple dissemination	Text and figure	1160	25	0	N/A
331	Instagram	Portuguese	Exercises and electrotherapy to reduce pain and fatigue in people with fibromyalgia	No	not applicable	not applicable	No	No	No	Simple dissemination	Text	299	9	0	N/A
332	Instagram	Portuguese	Strength and mobility exercises to reduce pain in people with chronic neck pain	Yes	No	Partial	No	No	No	Simple dissemination	Text and figure	1318	17	2	N/A
333	Instagram	Portuguese	Strengthening to reduce pain and increase mobility in people with knee osteoarthritis	No	not applicable	not applicable	Yes	Yes	No	Self-promotion	Text and figure	876	29	2	N/A
334	Instagram	Portuguese	Pilates to increase muscle strength and flexibility after stroke	No	not applicable	not applicable	Yes	Yes	No	Self-promotion	Text and figure	1392	6	1	N/A
335	Instagram	Portuguese	Virtual reality to improve movement, balance and gait in neurologic patients	No	not applicable	not applicable	No	No	No	Simple dissemination	Text and infographic	702	29	1	N/A
336	Instagram	Portuguese	Cryotherapy, manual therapy, electrotherapy and exercise to reduce pain and load control in athletes with tendinopathy	No	not applicable	not applicable	Yes	Yes	No	Self-promotion	Text and video	494	17	2	N/A
337	Instagram	Portuguese	Kinesiotaping is not indicated to treat people with musculoskeletal conditions	No	not applicable	not applicable	Yes	Yes	No	Self-promotion	Text and infographic	771	40	6	N/A
338	Instagram	Portuguese	Exercise to reduce pain in people with cervical herniated disc	No	not applicable	not applicable	No	No	No	Simple dissemination	Text and video	1300	44	4	N/A
339	Instagram	Portuguese	Physiotherapy to reduce pain, correct posture and movements, improve fitness, mobility and strength in people with osteophytes	No	not applicable	not applicable	Yes	Yes	No	Self-promotion	Text and infographic	3628	69	19	N/A
340	Instagram	Portuguese	Strengthening to prevent injuries in runners	No	not applicable	not applicable	No	No	No	Simple dissemination	Text and video	2890	58	2	N/A
341	Instagram	Portuguese	Kinesiotaping to correct movement, reduce pain, prevent injuries and oedema	No	not applicable	not applicable	Yes	Yes	No	Self-promotion	Text	835	20	0	N/A
342	Instagram	Portuguese	Exercise to prevent lymphedema in patients with breast cancer	No	not applicable	not applicable	Yes	Yes	No	Self-promotion	Text	835	49	1	N/A
343	Instagram	Portuguese	Exercise to reduce pain, improve mobility and strength after shoulder surgery	No	not applicable	not applicable	Yes	Yes	No	Self-promotion	Text	835	9	1	N/A
344	Instagram	Portuguese	Pilates to improve pumonary function after COVID	No	not applicable	not applicable	Yes	Yes	No	Self-promotion	Text and infographic	269	13	0	N/A
345	Instagram	Portuguese	Ozone therapy to reduce pain and inflammation	No	not applicable	not applicable	Yes	Yes	No	Self-promotion	Text and figure	1281	22	1	N/A
346	Instagram	Portuguese	Respiratory exercises to treat patients after COVID	No	not applicable	not applicable	No	No	No	Simple dissemination	Text and figure	3745	7	0	N/A
347	Instagram	Portuguese	Electrotherapy for chronic pain	No	not applicable	not applicable	No	No	No	Simple dissemination	Text and figure	935	55	16	N/A
348	Instagram	Portuguese	Physiotherapy to improve motor capacity and independency after stroke	No	not applicable	not applicable	Yes	Yes	No	Self-promotion	Text and figure	935	27	2	N/A
349	Instagram	Portuguese	Pilates to prevent pain and injuries	No	not applicable	not applicable	Yes	Yes	No	Self-promotion	Text and infographic	776	22	0	N/A
350	Instagram	Portuguese	Microphysiotherapy to treat patients with chronic pain	No	not applicable	not applicable	Yes	Yes	No	Self-promotion	Text and figure	1417	12	1	N/A
351	Instagram	Portuguese	Muscle stimulation for paresthesia	No	not applicable	not applicable	Yes	Yes	No	Self-promotion	Text and figure	529	6	0	N/A
352	Instagram	Portuguese	Physiotherapy to reduce pain, increase mobility and strength in patients with radiculopathy	No	not applicable	not applicable	Yes	Yes	No	Self-promotion	Text and figure	529	10	0	N/A
353	Instagram	Portuguese	Physiotherapy to prevent injuries related to exercise practice	No	not applicable	not applicable	No	No	No	Simple dissemination	Text and figure	121	14	2	N/A
354	Instagram	Portuguese	Cryotherapy to reduce pain, oedema and inflammation	No	not applicable	not applicable	No	No	No	Simple dissemination	Text and figure	121	8	0	N/A
355	Instagram	Portuguese	Core strengthening for herniated disk	No	not applicable	not applicable	No	No	No	Simple dissemination	Text and figure	121	9	2	N/A
356	Instagram	Portuguese	Respiratory exercise to reduce fatigue after COVID	No	not applicable	not applicable	No	No	No	Simple dissemination	Text and video	795	11	0	N/A
357	Instagram	Portuguese	Electrotherapy and Pilates for sciatica	No	not applicable	not applicable	Yes	Yes	No	Self-promotion	Text and figure	232	26	2	N/A
358	Instagram	Portuguese	Exercise, electrotherapy and manual therapy for low back pain	No	not applicable	not applicable	No	No	No	Simple dissemination	Text and figure	717	4	0	N/A
359	Instagram	Portuguese	Motor control exercise to prevent falls, improve balance and movements in elderly people	No	not applicable	not applicable	Yes	Yes	No	Self-promotion	Text and infographic	132	15	2	N/A
360	Instagram	Portuguese	Pilates to reduce pain, improve posture, strength, flexibility, mobility, coordenation and balance	No	not applicable	not applicable	Yes	Yes	No	Self-promotion	Text and infographic	113	33	3	N/A
361	Instagram	Portuguese	Exercises to treat sequels after COVID	No	not applicable	not applicable	Yes	Yes	No	Self-promotion	Text and infographic	101	14	0	N/A
362	Instagram	Portuguese	Kinesiotaping to reduce symptoms and improve functional capacity	No	not applicable	not applicable	Yes	Yes	Yes	Self-promotion	Text and figure	872	13	0	N/A
363	Instagram	Portuguese	Exercise to reduce pain, decrease oedema, improve strength, proprioception, gait and function after total knee replacement	No	not applicable	not applicable	Yes	Yes	No	Self-promotion	Text and video	289	23	2	N/A
364	Instagram	Portuguese	Respiratory exercises to treat respiratory conditions after COVID	No	not applicable	not applicable	Yes	Yes	Yes	Self-promotion	Text and figure	1046	3	0	N/A
365	Instagram	Portuguese	Therapeutic ultrasound, cryotherapy, massage, stretching and strengthening to reduce pain and inflammation for tendonitis	No	not applicable	not applicable	Yes	Yes	No	Self-promotion	Text and infographic	1036	20	1	N/A
366	Instagram	Portuguese	Physiotherapy to reduce pain, improve mobility, strength, flexibility and balance after knee surgery	No	not applicable	not applicable	No	No	No	Simple dissemination	Text and figure	2016	12	1	N/A
367	Instagram	Portuguese	Global posture reeducation for postural deviation	No	not applicable	not applicable	No	No	No	Simple dissemination	Text and figure	576	15	0	N/A
368	Instagram	Portuguese	Exercise to improve balance and gait after surgery to treat calcaneous fracture	No	not applicable	not applicable	Yes	No	No	Self-promotion	Text and video	413	11	0	N/A
369	Instagram	Portuguese	Cryotherapy, ultrasound, electrotherapy, stretching and strengthening to reduce pain in people with epicondilitis	No	not applicable	not applicable	Yes	Yes	No	Self-promotion	Text and figure	522	12	0	N/A
370	Instagram	Portuguese	Cryotherapy, insoles and stretching for plantar fasciitis	No	not applicable	not applicable	Yes	Yes	No	Self-promotion	Text and figure	2629	15	2	N/A
371	Instagram	Portuguese	Exercise to treat and prevent injuries in elderly people	No	not applicable	not applicable	No	No	No	Simple dissemination	Figure	1425	11	0	N/A
372	Instagram	Portuguese	Pilates to reduce spine pain	No	not applicable	not applicable	No	No	No	Simple dissemination	Text and figure	2383	26	4	N/A
373	Instagram	Portuguese	Electrotherapy and manual therapy to prevent and treat urinary incontinence	No	not applicable	not applicable	Yes	Yes	No	Self-promotion	Text and figure	2222	9	0	N/A
374	Instagram	Portuguese	Exercise to reduce pain and instability in the hip	No	not applicable	not applicable	Yes	Yes	No	Self-promotion	Text and video	413	9	0	N/A
375	Instagram	Portuguese	Exercise, manual therapy and electrotherapy to treat people with chondromalacia patellae	No	not applicable	not applicable	Yes	No	Yes	Simple dissemination with conflict	Text and figure	1125	14	1	N/A
376	Instagram	Portuguese	Pilates to prevent injuries and improve performance of ballet dancers	No	not applicable	not applicable	Yes	Yes	No	Self-promotion	Text and figure	823	6	0	N/A
377	Instagram	Portuguese	Exercise to prevent injuries related to running	No	not applicable	not applicable	No	No	No	Simple dissemination	Text and figure	131	10	0	N/A
378	Instagram	Portuguese	Exercise and electrotherapy to improve mobility after knee arthroplasty	No	not applicable	not applicable	No	No	No	Simple dissemination	Text and figure	218	17	0	N/A
379	Instagram	Portuguese	Manual therapy, insoles and exercise to reduce pain from calcaneous osteophytes	No	not applicable	not applicable	Yes	Yes	No	Self-promotion	Text and figure	1007	29	0	N/A
380	Instagram	Portuguese	Exercise to prevent knee injury	No	not applicable	not applicable	No	No	No	Simple dissemination	Text and figure	3055	15	0	N/A
381	Instagram	Portuguese	Exercise reduce bone deformity related to hallux valgus	No	not applicable	not applicable	Yes	No	Yes	Simple dissemination with conflict	Text and infographic	52900	2155	22	N/A
382	Instagram	Portuguese	Exercise to treat musculoskeletal conditions	No	not applicable	not applicable	No	No	No	Simple dissemination	Text and figure	51	1	0	N/A
383	Instagram	Portuguese	Auriculotherapy to reduce muscle pain	No	not applicable	not applicable	Yes	Yes	No	Self-promotion	Text and figure	570	2	0	N/A
384	Instagram	Portuguese	Mobility exercises to prevent injuries and improve performance	No	not applicable	not applicable	No	No	No	Simple dissemination	Text and figure	1610	2	0	N/A
385	Instagram	Portuguese	Exercise to treat work-related pain	No	not applicable	not applicable	No	No	No	Simple dissemination	Text and figure	1790	16	0	N/A
386	Instagram	Portuguese	Compression therapy to treat vascular diseases	No	not applicable	not applicable	Yes	Yes	No	Self-promotion	Text and figure	887	19	2	N/A
387	Instagram	Portuguese	Exercise to reduce pain and inflammation	No	not applicable	not applicable	No	No	No	Simple dissemination	Text and figure	381	4	0	N/A
388	Instagram	Portuguese	Virtual reality for rehabilitation of neurologic patients	No	not applicable	not applicable	Yes	Yes	No	Simple dissemination with conflict	Text and infographic	424	25	1	N/A
389	Instagram	Portuguese	Strength exercises for chondromalacia patellae	No	not applicable	not applicable	No	No	No	Simple dissemination	Text and infographic	2081	34	8	N/A
390	Instagram	Portuguese	Laser therapy to reduce acute and chronic pain	Yes	No	Partial	No	No	No	Simple dissemination	Text and infographic	629	44	2	N/A
391	Instagram	Portuguese	Physiotherapy to reduce pain, inflammation and oedema, and improve mobility and biomechanics after knee sprain	No	not applicable	not applicable	Yes	Yes	No	Self-promotion	Text and figure	1880	10	0	N/A
392	Instagram	Portuguese	Strength exercise for patients after COVID	No	not applicable	not applicable	Yes	Yes	No	Self-promotion	Text and figure	242	12	1	N/A
393	Instagram	Portuguese	Exercise to reduce low back pain	No	not applicable	not applicable	Yes	Yes	No	Self-promotion	Text and infographic	784	17	1	N/A
394	Instagram	Portuguese	Electrotherapy for fat reduction	No	not applicable	not applicable	No	No	No	Simple dissemination	Text and figure	4509	38	0	N/A
395	Instagram	Portuguese	Exercise to manage pain in people with subacromial impact syndrome	No	not applicable	not applicable	Yes	Yes	No	Self-promotion	Text and infographic	288	26	5	N/A
396	Instagram	Portuguese	Education for stroke prevention	Yes	Yes	Partial	Yes	No	Yes	Facilitated Information with conflict	Text and figure	10916	64	0	N/A
397	Instagram	Portuguese	Strengthening to prevent knee injuries	No	not applicable	not applicable	Yes	Yes	Yes	Self-promotion	Text and figure	556	1	0	N/A
398	Instagram	Portuguese	Exercise to improve knee stability	No	not applicable	not applicable	Yes	Yes	Yes	Self-promotion	Text and video	156231	4502	49	N/A
399	Instagram	Portuguese	Exercise to improve core stability	No	not applicable	not applicable	Yes	Yes	Yes	Self-promotion	Text and video	156231	3957	27	N/A
400	Instagram	Portuguese	Exercise to reduce pain in people with Morton's neuroma	No	not applicable	not applicable	Yes	Yes	Yes	Self-promotion	Text and video	156231	4093	77	N/A
401	Instagram	Portuguese	Exercise to improve hip stability	No	not applicable	not applicable	Yes	Yes	Yes	Self-promotion	Text and video	156231	5222	63	N/A
402	Instagram	Portuguese	Physiotherapy to reduce pain and inflammation, improve stability, strength and flexibility in people with chondromalacia patellae	No	not applicable	not applicable	No	No	No	Simple dissemination	Text and figure	1480	55	1	N/A
403	Instagram	Portuguese	Exercise to improve mobility, strength and flexibility in people with lumbar stenosis	No	not applicable	not applicable	No	No	No	Simple dissemination	Text and figure	1054	11	0	N/A
404	Instagram	Portuguese	Exercise for low back pain	No	not applicable	not applicable	No	No	No	Simple dissemination	Text and video	1373	31	0	N/A
405	Instagram	Portuguese	Physiotherapy to prevent deformity in children	No	not applicable	not applicable	Yes	Yes	No	Self-promotion	Text and figure	709	3	0	N/A
406	Instagram	Portuguese	Massage therapy to reduce pain	No	not applicable	not applicable	Yes	Yes	No	Self-promotion	Text and video	1648	11	0	N/A
407	Instagram	Portuguese	Aerobic exercises to improve cardiovascular conditioning in ICU	No	not applicable	not applicable	Yes	No	Yes	Simple dissemination with conflict	Text and video	9160	133	0	N/A
408	Instagram	Portuguese	Aerobic exercises to improve cardiovascular conditioning in patients with cancer	No	not applicable	not applicable	Yes	No	Yes	Simple dissemination with conflict	Text and video	9160	452	5	N/A
409	Instagram	Portuguese	Early mobilization in ICU environment to prevent complication	Yes	not assessed	not assessed	Yes	No	Yes	Facilitated Information with conflict	Text and infographic	9160	257	1	N/A
410	Instagram	Portuguese	Exercise to reduce pain and inflammation, improve stability, strength and flexibility in people with chondromalacia patellae	No	not applicable	not applicable	No	No	No	Simple dissemination	Text and figure	685	12	1	N/A
411	Instagram	Portuguese	Exercise to improve mobility, strength and proprioception in people with shoulder injury	No	not applicable	not applicable	No	No	No	Simple dissemination	Text and figure	467	17	1	N/A
412	Instagram	Portuguese	Stretching, strengtheninig and electrotherapy for epicondilitis	No	not applicable	not applicable	Yes	No	Yes	Simple dissemination with conflict	Text and infographic	3214	37	6	N/A
413	Instagram	Portuguese	Aacupuncture to treat facial paresthesia	No	not applicable	not applicable	Yes	Yes	No	Self-promotion	Text and figure	957	5	0	N/A
414	Instagram	Portuguese	Low pressure exercise for urinary incontinence	No	not applicable	not applicable	Yes	Yes	No	Self-promotion	Text and figure	2823	7	0	N/A
415	Instagram	Portuguese	Global posture reeducation for scoliosis	No	not applicable	not applicable	Yes	Yes	No	Self-promotion	Text and figure	2823	7	0	N/A
416	Instagram	Portuguese	Exercise to reduce pain and fatigue in people with fibromyalgia	No	not applicable	not applicable	No	No	No	Simple dissemination	Text and figure	570	5	0	N/A
417	Instagram	Portuguese	Exercise to improve strength and stability of the knee	No	not applicable	not applicable	Yes	Yes	Yes	Self-promotion	Text and video	1765	36	2	N/A
418	Instagram	Portuguese	Strength exercise to prevent injuries	No	not applicable	not applicable	Yes	Yes	Yes	Self-promotion	Text and video	1765	10	1	N/A
419	Instagram	Portuguese	Exercise to reduce sacroiliac pain	No	not applicable	not applicable	Yes	Yes	Yes	Self-promotion	Text and video	1765	6	0	N/A
420	Instagram	Portuguese	Pilates for elderly people	No	not applicable	not applicable	No	No	No	Simple dissemination	Text and figure	460	10	0	N/A
421	Instagram	Portuguese	Exercise to reduce acute spine pain	No	not applicable	not applicable	Yes	Yes	No	Self-promotion	Infographic	345	9	0	N/A
422	Instagram	Portuguese	Physiotherapy to treat and prevent fragility in elderly people	No	not applicable	not applicable	Yes	No	Yes	Simple dissemination with conflict	Text and infographic	821	24	0	N/A
423	Instagram	Portuguese	Exercise to reduce pain and improve mental health	No	not applicable	not applicable	Yes	Yes	No	Self-promotion	Text and infographic	852	11	0	N/A
424	Instagram	Portuguese	Stretching is not indicated for acute pain	No	not applicable	not applicable	No	No	No	Simple dissemination	Text and figure	191	14	0	N/A
425	Instagram	Portuguese	Cryotherapy to reduce pain, control oedema and inflammation, and reduce blood flow	No	not applicable	not applicable	No	No	No	Simple dissemination	Text and figure	2746	83	3	N/A
426	Instagram	Portuguese	Strength exercise for neck and shoulder pain	Yes	No	Partial	No	No	No	Facilitated Information	Text and figure	1907	53	0	N/A
427	Instagram	Portuguese	Osteopathy to reduce pain	No	not applicable	not applicable	No	No	No	Simple dissemination	Text and figure	1364	23	0	N/A
428	Instagram	Portuguese	Pilates to improve posture, reduce pain and improve strength of pelvic floor in pregnant women	No	not applicable	not applicable	Yes	Yes	No	Self-promotion	Text and figure	199	5	1	N/A
429	Instagram	Portuguese	Massage therapy, thermotherapy, acupuncture and stretching for acute neck pain	No	not applicable	not applicable	Yes	Yes	No	Self-promotion	Text and figure	10513	6	0	N/A
430	Instagram	Portuguese	Dry needling to reduce pain	No	not applicable	not applicable	Yes	Yes	No	Self-promotion	Text and figure	932	17	0	N/A
431	Instagram	Portuguese	Pilates to treat low back pain	No	not applicable	not applicable	Yes	Yes	No	Self-promotion	Text and video	796	20	0	N/A
432	Instagram	Portuguese	Cupping therapy to reduce pain and increase blood flow	No	not applicable	not applicable	Yes	Yes	No	Self-promotion	Text and figure	3140	8	0	N/A
433	Instagram	Portuguese	Exercise to prevent an treat people with cardiovascular conditioning	No	not applicable	not applicable	Yes	No	Yes	Simple dissemination with conflict	Text and infographic	5802	26	1	N/A
434	Instagram	Portuguese	Aquatic therapy to prevent injuries	No	not applicable	not applicable	No	No	No	Simple dissemination	Text and video	1487	28	2	N/A
435	Instagram	Portuguese	Physiotherapy to prevent complications during pregnancy	No	not applicable	not applicable	Yes	No	Yes	Simple dissemination with conflict	Text and figure	1687	15	0	N/A
436	Instagram	Portuguese	Physiotherapy to treat pulmonary and motor complications related to COVID	No	not applicable	not applicable	Yes	Yes	No	Self-promotion	Text and figure	2106	14	0	N/A
437	Instagram	Portuguese	Myofascial release to increase blood flow, flexibility and mobility	No	not applicable	not applicable	Yes	No	Yes	Simple dissemination with conflict	Text and infographic	1515	19	1	N/A
438	Instagram	Portuguese	Physiotherapy to increase strength, blood flow and mobility after surgeries	No	not applicable	not applicable	No	No	No	Simple dissemination	Text and infographic	1819	31	0	N/A
439	Instagram	Portuguese	Visceral osteopathy to improve functional capacity	No	not applicable	not applicable	Yes	Yes	Yes	Self-promotion	Text and infographic	1910	10	0	N/A
440	Instagram	Portuguese	Chiropractic for postural correction and pain reduction	No	not applicable	not applicable	Yes	Yes	No	Self-promotion	Text and figure	1177	24	1	N/A
441	Instagram	Portuguese	Stretching before running does not prevent injuries	Yes	No	Partial	No	No	No	Facilitated Information	Text and video	1641	27	1	N/A
442	Instagram	Portuguese	Stretching before running does not prevent injuries	Yes	No	Innacurate	No	No	No	Facilitated Information	Text and infographic	1641	20	3	N/A
443	Instagram	Portuguese	Respiratory training during exercises	No	not applicable	not applicable	No	No	No	Simple dissemination	Text and figure	183	57	12	N/A
444	Instagram	Portuguese	Rehabilitation for long COVID	No	not applicable	not applicable	No	No	No	Simple dissemination	Text and infographic	126	3	0	N/A
445	Instagram	Portuguese	Myofascial release to increase blood flow and treat trigger points	No	not applicable	not applicable	Yes	Yes	No	Self-promotion	Text and figure	710	29	0	N/A
446	Instagram	Portuguese	Aquatic therapy for rehabilitation after COVID	No	not applicable	not applicable	Yes	Yes	No	Self-promotion	Text and video	5276	8	0	N/A
447	Instagram	Portuguese	Exercise to reduce low back pain	No	not applicable	not applicable	No	No	No	Simple dissemination	Text and figure	372	10	3	N/A
448	Instagram	Portuguese	Exercise to treat injuried soccer players	Yes	not assessed	not assessed	No	No	No	Simple dissemination	Text	1075	33	4	N/A
449	Instagram	Portuguese	Manual therapy, cupping therapy, cryotherapy and kinesiotaping to reduce pain	No	not applicable	not applicable	Yes	Yes	No	Self-promotion	Text and infographic	1751	23	0	N/A
450	Instagram	Portuguese	Pilates for rehabilitation after COVID	No	not applicable	not applicable	Yes	Yes	No	Self-promotion	Text and figure	1069	11	0	N/A
451	Instagram	Portuguese	Exercise for patellofemoral pain	No	not applicable	not applicable	No	No	No	Simple dissemination	Text and figure	28542	19	0	N/A
452	Instagram	Portuguese	Continuous positive airway pressure to treat sleep disorders	No	not applicable	not applicable	Yes	Yes	Yes	Self-promotion	Text and figure	514	26	0	N/A
453	Instagram	Portuguese	Exercise to treat people with cardiac insufficiency	Yes	No	Accurate	No	No	No	Facilitated Information	Infographic	325	33	1	N/A
454	Instagram	Portuguese	Exercise to treat sequels from COVID	No	not applicable	not applicable	No	No	No	Simple dissemination	Text and video	1315	8	2	N/A
455	Instagram	Portuguese	Myofascial release to reduce pain and improve flexibility	No	not applicable	not applicable	Yes	Yes	Yes	Self-promotion	Text and figure	555	21	4	N/A
456	Instagram	Portuguese	Physiotherapy to prevent pospartum disorders	No	not applicable	not applicable	Yes	Yes	No	Self-promotion	Text and figure	820	7	0	N/A
457	Instagram	Portuguese	Exercise program to prevent hamstring injury	Yes	No	Accurate	Yes	No	Yes	Facilitated Information with conflict	Text and video	1743	6	0	N/A
458	Instagram	Portuguese	Manual therapy for rehabilitation	Yes	No	Accurate	Yes	Yes	Yes	Facilitated Information with conflict	Text and video	1743	10	0	N/A
459	Instagram	Portuguese	Pilates for multiple sclerosis	No	not applicable	not applicable	No	No	No	Simple dissemination	Infographic	446	3	0	N/A
460	Instagram	Portuguese	Rehabilitation for rehabilitation after COVID	No	not applicable	not applicable	Yes	Yes	No	Self-promotion	Text and infographic	80	28	3	N/A
461	Instagram	Portuguese	Mobility exercise for spine pain	No	not applicable	not applicable	Yes	No	Yes	Simple dissemination with conflict	Text and infographic	849	25	0	N/A
462	Instagram	Portuguese	Exercise to improve strength, mobility, balance and proprioception in people with knee osteoarthritis	Yes	No	Partial	Yes	No	Yes	Facilitated Information with conflict	Text and infographic	25906	58	0	N/A
463	Instagram	Portuguese	Electrotherapy for muscle injury	No	not applicable	not applicable	No	No	No	Simple dissemination	Text and figure	4720	21	0	N/A
464	Instagram	English	Strengthening for neck muscles to prevent injuries	Yes	Yes	Partial	Yes	Yes	No	Simple dissemination with conflict	Text and video	215	15	0	N/A
465	Instagram	English	Physiotherapy to treat injuries related to sport practice	No	not applicable	not applicable	Yes	No	Yes	Self-promotion	Text and infographic	1390	16	0	N/A
466	Instagram	English	Exercise to improve neck posture, and reduce pain ans stiffness	No	not applicable	not applicable	No	No	No	Simple dissemination	Text and infographic	36	7	0	N/A
467	Instagram	English	Stretching to improve flexibility in people with neck pain	No	not applicable	not applicable	No	No	No	Simple dissemination	Text and figure	36	10	0	N/A
468	Instagram	English	Cupping therapy to reduce pain, improve flexibility and decrease muscle tension	No	not applicable	not applicable	Yes	Yes	No	Self-promotion	Infographic	36	7	0	N/A
469	Instagram	English	Cryotherapy to reduce delayed onset muscle soreness	No	not applicable	not applicable	No	No	No	Simple dissemination	Text	36	5	0	N/A
470	Instagram	English	Strengthening to prevent injuries, improve balance and bone health	No	not applicable	not applicable	Yes	Yes	Yes	Self-promotion	Text and video	246	10	0	N/A
471	Instagram	English	Strengthening of gluteal muscles to prevent injuries and health promotion	No	not applicable	not applicable	Yes	Yes	No	Self-promotion	Text and video	254	47	1	N/A
472	Instagram	English	Exercise to reduce sevety and frequency of low back pain	No	not applicable	not applicable	Yes	Yes	Yes	Self-promotion	Text and figure	74	1	1	N/A
473	Instagram	English	Electrotherapy to reduce low back pain	No	not applicable	not applicable	No	No	No	Simple dissemination	Text and figure	195	1	12	N/A
474	Instagram	English	Joint manipulation to reduce pain, and improve function and recovery perception in people with shoulder pain	No	not applicable	not applicable	No	No	No	Simple dissemination	Text and figure	10352	51	1	N/A
475	Instagram	English	Kinesiotaping and exercise to reduce pain from plantar fasciitis	No	not applicable	not applicable	No	No	No	Simple dissemination	Text and figure	10352	16	0	N/A
476	Instagram	English	Manual therapy to improve mobility, reduce inflammation and increase flexibility	No	not applicable	not applicable	No	No	No	Simple dissemination	Text and figure	10352	13	0	N/A
477	Instagram	English	Pilates to improve strength and mobility, and develop coordenation and posture	No	not applicable	not applicable	Yes	Yes	No	Self-promotion	Text and figure	138	6	0	N/A
478	Instagram	English	Strengthening for neck pain	No	not applicable	not applicable	Yes	Yes	No	Self-promotion	Text and video	576	66	1	N/A
479	Instagram	English	Exercise to manage lymphedema	No	not applicable	not applicable	Yes	Yes	No	Self-promotion	Text and figure	937	46	0	N/A
480	Instagram	English	Exercise for anterior cruciate ligament rehabilitation	No	not applicable	not applicable	Yes	Yes	Yes	Self-promotion	Text and video	448	21	0	N/A
481	Instagram	English	Power exercise for rehabilitation of atheletes with upper limb alterations	No	not applicable	not applicable	Yes	No	Yes	Simple dissemination with conflict	Text and video	27788	281	7	N/A
482	Instagram	English	Mobility exercise for shoulder pain	No	not applicable	not applicable	Yes	No	Yes	Simple dissemination with conflict	Text and video	99582	3355	31	N/A
483	Instagram	English	Exercise to prevent sport-related injuries	No	not applicable	not applicable	Yes	No	Yes	Simple dissemination with conflict	Text and video	99582	416	4	N/A
484	Instagram	English	Strengthening of hip adductor muscles for groin pain	No	not applicable	not applicable	Yes	No	Yes	Simple dissemination with conflict	Text and video	99582	821	10	N/A
485	Instagram	English	Exercise to reduce stiffness, falls frequency, fatigue, imbalance and lack of mobility in elderly people	No	not applicable	not applicable	Yes	Yes	Yes	Self-promotion	Text and figure	14567	113	2	N/A
486	Instagram	English	Exercise for sciatica	No	not applicable	not applicable	Yes	No	Yes	Simple dissemination with conflict	Text and figure	3460	27	1	N/A
487	Instagram	English	Bandage for knee pain	No	not applicable	not applicable	Yes	Yes	Yes	Self-promotion	Text and figure	557	16	0	N/A
488	Instagram	English	Myofascial release for neck pain	No	not applicable	not applicable	Yes	No	Yes	Simple dissemination with conflict	Text and video	842	13	0	N/A
489	Instagram	English	Physiotherapy to treat and prevent alterations related to pregancy	No	not applicable	not applicable	Yes	Yes	No	Self-promotion	Text and infographic	1006	56	0	N/A
490	Instagram	English	Exercise and education to improve strength and function during oncologic treatment	No	not applicable	not applicable	Yes	Yes	Yes	Self-promotion	Text and infographic	1580	8	0	N/A
491	Instagram	English	Exercise for rehabilitation of musculoskeletal conditions	No	not applicable	not applicable	Yes	No	Yes	Self-promotion	Text and video	134	3	0	N/A
492	Instagram	English	Massage therapy to improve flexibility and mobility, and reduce muscle tension and spasms	No	not applicable	not applicable	Yes	Yes	No	Self-promotion	Text and infographic	58	14	1	N/A
493	Instagram	English	Isometric exercise for neck pain	No	not applicable	not applicable	No	No	No	Simple dissemination	Text, infographic and video	2061	31	1	N/A
494	Instagram	English	Pilates to treat injuries, correct postural deviation and recude spinal pain	No	not applicable	not applicable	Yes	Yes	No	Self-promotion	Text and figure	3941	231	1	N/A
495	Instagram	English	Strengthening to reduce shoulder pain	No	not applicable	not applicable	Yes	Yes	No	Simple dissemination with conflict	Text and video	2917	38	4	N/A
496	Instagram	English	Dry needling for rehabilitation of neck injuries	No	not applicable	not applicable	Yes	Yes	No	Self-promotion	Text and figure	197	10	1	N/A
497	Instagram	English	Motor imagery, education and exercise for rehabilitation of different conditions	No	not applicable	not applicable	No	No	No	Simple dissemination	Text and video	158	7	1	N/A
498	Instagram	English	Segmental stability exercises for low back pain rehabilitation	No	not applicable	not applicable	No	No	No	Simple dissemination	Text and figure	172	17	0	N/A
499	Instagram	English	Exercise, orthosis and cryotherapy to treat hammer toe	No	not applicable	not applicable	No	No	No	Simple dissemination	Text and figure	144	15	1	N/A
500	Instagram	English	Rehabilitation for anterior cruciate ligament injury	No	not applicable	not applicable	Yes	Yes	Yes	Self-promotion	Text and infographic	759	14	0	N/A
501	Instagram	English	Thermotherapy to treat muscle pain	No	not applicable	not applicable	Yes	No	Yes	Simple dissemination with conflict	Infographic	64	14	1	N/A
502	Instagram	English	Strengthening for rotator cuff during shoulder rehabilitation	No	not applicable	not applicable	No	No	No	Simple dissemination	Text and video	1173	93	11	N/A
503	Instagram	English	Exercise to prevent hamstring injury	No	not applicable	not applicable	Yes	Yes	No	Self-promotion	Text and video	12014	61	10	N/A
504	Instagram	English	Acupuncture for low back pain	No	not applicable	not applicable	Yes	No	Yes	Simple dissemination with conflict	Text and video	1245	7	0	N/A
505	Instagram	English	Physiotherapy to treat urinary incontinence	No	not applicable	not applicable	Yes	No	Yes	Simple dissemination with conflict	Text	48	0	0	N/A
506	Instagram	English	Strengthening for hand muscles to treat epicondylitis	No	not applicable	not applicable	Yes	No	Yes	Simple dissemination with conflict	Text and video	578	25	8	N/A
507	Instagram	English	Spinal manipulation to treat neck and lumbar pain and stiffness	No	not applicable	not applicable	No	No	No	Simple dissemination	Text and video	17261	189	10	N/A
508	Instagram	English	Exercise for rehabilitation of atheletes	No	not applicable	not applicable	Yes	Yes	No	Self-promotion	Text and figure	396	56	9	N/A
509	Instagram	English	Education about pain to older people	Yes	No	Accurate	Yes	No	Yes	Facilitated Information with conflict	Text	4732	6	1	N/A
510	Instagram	English	Pliometric exercise to prevent injuries or return to sport	No	not applicable	not applicable	No	No	No	Simple dissemination	Text and video	204	35	1	N/A
511	Instagram	English	Physiotherapy to reduce inflammation and pain, improve function and posture in people with sciatica	No	not applicable	not applicable	Yes	Yes	No	Self-promotion	Text and figure	868	4	0	N/A
512	Instagram	English	Pilates to improve posture, flexibility, balance and strength	No	not applicable	not applicable	No	No	No	Simple dissemination	Text and infographic	51	8	1	N/A
513	Instagram	English	Exercise to prevent muscle strain	No	not applicable	not applicable	Yes	No	Yes	Simple dissemination with conflict	Text and figure	649	15	4	N/A
514	Instagram	English	Stretching and strengthening to reduce stiffness and improve mobility in people with subacromial pain syndrome	Yes	No	Partial	No	No	No	Facilitated Information	Text and infographic	217	2	0	N/A
515	Instagram	English	Exercise for rehabilitation of patients with foot deformity	No	not applicable	not applicable	No	No	No	Simple dissemination	Text and video	360	62	3	N/A
516	Instagram	English	Mobility exercise to improve function and reduce pain in people with low back pain	No	not applicable	not applicable	No	No	No	Simple dissemination	Text and video	14900	738	16	N/A
517	Instagram	English	Exercise for knee injuries	No	not applicable	not applicable	No	No	No	Simple dissemination	Text and video	1066	14	0	N/A
518	Instagram	English	Strengthening with elastic resistance for knee pain	No	not applicable	not applicable	Yes	Yes	No	Self-promotion	Text and video	1066	21	0	N/A
519	Instagram	English	Gluteal strengthening to prevent and treat low back pain	No	not applicable	not applicable	Yes	Yes	No	Self-promotion	Text and video	1066	30	1	N/A
520	Instagram	English	Exercise to reduce pain, improve mobility and strength after ankle sprain	Yes	No	Partial	No	No	No	Simple dissemination	Text, figure and video	170	25	1	N/A
521	Instagram	English	Knee exercise to prevent running-related injuries	No	not applicable	not applicable	Yes	Yes	Yes	Self-promotion	Text and video	165	28	5	N/A
522	Instagram	English	Exercise for hypertension	No	not applicable	not applicable	No	No	No	Simple dissemination	Text and infographic	89	6	3	N/A
523	Instagram	English	Exercise for knee osteoarthritis	No	not applicable	not applicable	No	No	No	Simple dissemination	Text and infographic	89	12	1	N/A
524	Instagram	English	Manual therapy for soft tissue rehabilitation	No	not applicable	not applicable	Yes	Yes	No	Self-promotion	Text and figure	162	20	4	N/A
525	Instagram	English	Massage therapy to reduce pain and inflammation, and increase blood flow	No	not applicable	not applicable	Yes	No	Yes	Self-promotion	Text and figure	965	17	0	N/A
526	Instagram	English	Bandage compression to reduce oedema and prevent scar complications from burns	No	not applicable	not applicable	No	No	No	Simple dissemination	Text and video	823	66	6	N/A
527	Instagram	English	Massage therapy to reduce delayed onset muscle soreness and prevent injury	No	not applicable	not applicable	Yes	Yes	No	Self-promotion	Text and infographic	12300	31	0	N/A
528	Instagram	English	Joint mobilization to improve cervical mobility in people with headache	No	not applicable	not applicable	Yes	No	Yes	Simple dissemination with conflict	Text and video	11765	131	0	N/A
529	Instagram	English	Exercise to prevent low back pain	No	not applicable	not applicable	No	No	No	Simple dissemination	Text and video	87192	1841	73	N/A
530	Instagram	English	Strengthening to redeuce low back pain	No	not applicable	not applicable	Yes	Yes	No	Self-promotion	Text and video	191000	1977	30	N/A
531	Instagram	English	Mobility exercise to prevent shoulder injuries	No	not applicable	not applicable	No	No	No	Simple dissemination	Text and video	103008	10073	141	N/A
532	Instagram	English	Physiotherapy to improve function and general health	No	not applicable	not applicable	No	No	No	Simple dissemination	Text	1138	1	0	N/A
533	Instagram	English	Exercise to prevent injuries and improve quality of life	No	not applicable	not applicable	Yes	No	Yes	Simple dissemination with conflict	Text and infographic	87	20	1	N/A
534	Instagram	English	Osteopathy to improve flexibility and mobility, and reduce pain	No	not applicable	not applicable	Yes	Yes	No	Self-promotion	Text and figure	52	8	1	N/A
535	Instagram	English	Exercise to prevent injuries in dancers	No	not applicable	not applicable	No	No	No	Simple dissemination	Text and infographic	132	7	1	N/A
536	Instagram	English	Physiotherapy to improve mobility, flexibility and strength, and reduce symptoms in people with spondylolysis	No	not applicable	not applicable	Yes	Yes	No	Self-promotion	Text and figure	1109	2	0	N/A
537	Instagram	English	Strengthening to prevent shoulder injuries	No	not applicable	not applicable	No	No	No	Simple dissemination	Text and video	361	53	4	N/A
538	Instagram	English	Hip adductor strengthening to prevent muscle injury	Yes	No	Accurate	No	No	No	Facilitated Information	Text, figure and video	87	20	3	N/A
539	Instagram	English	Dry needling to treat trigger points, reduce pain and improve function	No	not applicable	not applicable	Yes	Yes	Yes	Self-promotion	Text and infographic	4628	25	1	N/A
540	Instagram	English	Osteopathy to realign bones, muscles and ligaments for rehabilitation	No	not applicable	not applicable	No	No	No	Simple dissemination	Text and figure	202	10	1	N/A
541	Instagram	English	Exercise, aquatic therapy and electrotherapy to improve mobility and fitness, reduce pain and prevent complication in elderly people	No	not applicable	not applicable	Yes	Yes	Yes	Self-promotion	Text and infographic	358	4	0	N/A
542	Instagram	English	Kinesiotaping for ankle sprain	No	not applicable	not applicable	Yes	Yes	Yes	Self-promotion	Text and figure	1459	16	1	N/A
543	Instagram	English	Bandage to increase blood flow, provide support, increase mobility and reduce pain	No	not applicable	not applicable	Yes	Yes	No	Self-promotion	Text and infographic	166	10	1	N/A
544	Instagram	English	Education to manage acute injuries	No	not applicable	not applicable	Yes	Yes	No	Self-promotion	Text and infographic	166	7	1	N/A
545	Instagram	English	Strengthening, manual therapy, taping and mobility exercise for gluteal tendinopathy	No	not applicable	not applicable	Yes	Yes	No	Self-promotion	Text and figure	269	9	1	N/A
546	Instagram	English	Strengthening of hip adductors to prevent groin injury	No	not applicable	not applicable	No	No	No	Simple dissemination	Text and video	269	7	0	N/A
547	Instagram	English	Aerobic exercises to prevent injuries and improve mental health	No	not applicable	not applicable	No	No	No	Simple dissemination	Text and figure	266	7	1	N/A
548	Instagram	English	Myofascial release to treat trigger points, and improve balance, mobility and flexibility	No	not applicable	not applicable	No	No	No	Simple dissemination	Text and figure	594	44	0	N/A
549	Instagram	English	Hip strengthening for rehabilitation	No	not applicable	not applicable	Yes	Yes	No	Self-promotion	Text and video	796	10	1	N/A
550	Instagram	English	Physiotherapy to improve strength and movement after surgery	No	not applicable	not applicable	No	No	No	Simple dissemination	Text and figure	9	0	0	N/A
551	Instagram	English	Exercise to treat neural compression	No	not applicable	not applicable	Yes	No	Yes	Simple dissemination with conflict	Text and video	3462	37	4	N/A
552	Instagram	English	Stretching to increase muscle control, flexibility and mobility	No	not applicable	not applicable	Yes	Yes	No	Self-promotion	Text and figure	2194	74	0	N/A
553	Instagram	English	Manual therapy to recovery after sport practice	No	not applicable	not applicable	No	No	No	Simple dissemination	Text and video	41100	252	6	N/A
554	Instagram	English	Cupping therapy for ankle pain	No	not applicable	not applicable	No	No	No	Simple dissemination	Text and figure	41099	418	48	N/A
555	Instagram	English	Thermotherapy for ankle sprain	No	not applicable	not applicable	Yes	Yes	No	Self-promotion	Text and infographic	500	21	0	N/A
556	Instagram	English	Massage therapy to reduce pain, muscle tension and blood pressure, and improve flexibility and circulation	No	not applicable	not applicable	Yes	Yes	No	Self-promotion	Text and infographic	786	12	4	N/A
557	Instagram	English	Strengthening and electrotherapy for anterior cruciate ligament injury rehabilitation	No	not applicable	not applicable	Yes	No	Yes	Simple dissemination with conflict	Text and video	2411	84	1	N/A
558	Instagram	English	Warm-up exercise to prevent injuries	No	not applicable	not applicable	Yes	No	Yes	Simple dissemination with conflict	Text and video	151	11	3	N/A
559	Instagram	English	Exercise, myofascial release and electrotherapy to manage complications during oncologic treatment	No	not applicable	not applicable	No	No	No	Simple dissemination	Text and figure	27	7	1	N/A
560	Instagram	English	Laser therapy to reduce inflammation and pain	No	not applicable	not applicable	No	No	No	Simple dissemination	Text and figure	44	18	2	N/A
561	Instagram	English	Therapeutic ultrasound to reduce pain and improve regeneration	No	not applicable	not applicable	Yes	Yes	No	Self-promotion	Text and figure	44	19	1	N/A
562	Instagram	English	Strengthening and mobility exercises for shoulder impingement syndrome	No	not applicable	not applicable	Yes	Yes	No	Self-promotion	Text and infographic	372	8	0	N/A
563	Instagram	English	Cupping therapy to treat different conditions	No	not applicable	not applicable	No	No	No	Simple dissemination	Text and figure	271	34	0	N/A
564	Instagram	English	Electrotherapy to preserve muscle mass, accelerate recovery, improve performance and reduce inflammation	Yes	No	Partial	No	No	No	Facilitated Information	Text and video	187	14	1	N/A
565	Instagram	English	Electrotherapy to reduce pain	Yes	No	Partial	No	No	No	Facilitated Information	Text and figure	187	13	0	N/A
566	Instagram	English	Manual therapy to relief pain, and exercise for strengthening and movement control	No	not applicable	not applicable	Yes	Yes	No	Self-promotion	Text	376	0	0	N/A
567	Instagram	English	Pilates for low back pain	No	not applicable	not applicable	Yes	Yes	Yes	Self-promotion	Text	1017	15	1	N/A
568	Instagram	English	Respiratory exercise, strengthening and mobility exercise for post-surgery	No	not applicable	not applicable	Yes	No	Yes	Simple dissemination with conflict	Text	793	10	0	N/A
569	Instagram	English	Manual therapy for soft-tissue rehabilitation	No	not applicable	not applicable	Yes	No	Yes	Self-promotion	Text and figure	171	5	0	N/A
570	Instagram	English	Stretching to improve flexibility, mobility, performance, blood flow and posture	No	not applicable	not applicable	Yes	Yes	Yes	Self-promotion	Text and figure	1375	3	0	N/A
571	Instagram	English	Cryotherapy, rest, exercise, posture correction and massage for neck pain	No	not applicable	not applicable	Yes	Yes	Yes	Self-promotion	Text and figure	1375	4	1	N/A
572	Instagram	English	Thermotherapy, manual therapy, electrotherapy and exercise for low back pain	No	not applicable	not applicable	Yes	Yes	Yes	Self-promotion	Text and figure	1375	6	0	N/A
573	Instagram	English	Strength and mobility exercise for low back pain	No	not applicable	not applicable	No	No	No	Simple dissemination	Text and infographic	147	10	0	N/A
574	Instagram	English	Gluteal strengthening for rehabilitation of lower limb injuries	Yes	No	Accurate	Yes	Yes	Yes	Facilitated Information with conflict	Text and figure	91	5	0	N/A
575	Instagram	English	Early rehabilitation for muscle strain in athletes	Yes	Yes	Partial	Yes	Yes	Yes	Facilitated Information with conflict	Text and figure	162	7	0	N/A
576	Instagram	English	Cupping therapy, dry needling, bandade and osteopathy for rehabilitation of musculoskeletal conditions	No	not applicable	not applicable	No	No	No	Simple dissemination	Text and figure	148	46	4	N/A
577	Instagram	English	Exercise for neck pain	No	not applicable	not applicable	No	No	No	Simple dissemination	Text and video	269	11	0	N/A
578	Instagram	English	Stretching, strengthening and mobility exercises for scoliosis	No	not applicable	not applicable	No	No	No	Simple dissemination	Text and video	269	24	0	N/A
579	Instagram	English	Mobility exercise for carpal tunnel syndrome	No	not applicable	not applicable	No	No	No	Simple dissemination	Text and video	269	39	1	N/A
580	Instagram	English	Exercise to improve shoulder mobility	No	not applicable	not applicable	No	No	No	Simple dissemination	Text and video	269	14	0	N/A
581	Instagram	English	Chiropractic to manage symptoms and complains from low back pain	No	not applicable	not applicable	Yes	Yes	No	Self-promotion	Text and video	373	7	0	N/A
582	Instagram	English	Physiotherapy, manual therapy and chiropractic to treat psoas syndrome	No	not applicable	not applicable	No	No	No	Simple dissemination	Text and video	647	44	2	N/A
583	Instagram	English	Exercise for kyphosis	No	not applicable	not applicable	Yes	Yes	No	Self-promotion	Text and figure	274	32	1	N/A
584	Instagram	English	Balance exercise to improve foot stability and lower limb strength	No	not applicable	not applicable	No	No	No	Simple dissemination	Text and video	3706	74	5	N/A
585	Instagram	English	Strengthening for overhead shoulder pain	No	not applicable	not applicable	No	No	No	Simple dissemination	Text and video	2877	32	2	N/A
586	Instagram	English	Exercise to prevent pain and correct poor posture	No	not applicable	not applicable	No	No	No	Simple dissemination	Text and video	2877	90	8	N/A
587	Instagram	English	Lymphatic drainage for oedema	No	not applicable	not applicable	Yes	Yes	No	Self-promotion	Text and figure	395	10	0	N/A
588	Instagram	English	Physiotherapy to prepare for surgery	No	not applicable	not applicable	Yes	No	Yes	Self-promotion	Text and figure	415	13	1	N/A
589	Instagram	English	Exercise for low back pain	No	not applicable	not applicable	No	No	No	Simple dissemination	Text and video	664	33	0	N/A
590	Instagram	English	Exercise for patellofemoral pain	No	not applicable	not applicable	No	No	No	Simple dissemination	Text and video	664	45	0	N/A
591	Instagram	English	Respiratory exercises to manage complications from long COVID syndrome	No	not applicable	not applicable	Yes	No	Yes	Simple dissemination with conflict	Text and infographic	459	18	0	N/A
592	Instagram	English	Exercise to improve postural deviation and strength	No	not applicable	not applicable	No	No	No	Simple dissemination	Text and video	137	39	1	N/A
593	Instagram	English	Exercise with blood flow restriction for muscle strenghen	No	not applicable	not applicable	Yes	Yes	Yes	Self-promotion	Text and figure	681	26	1	N/A
594	Instagram	English	Mobility exercise for shoulder injuries	No	not applicable	not applicable	Yes	Yes	No	Self-promotion	Text and video	248	32	0	N/A
595	Instagram	English	Plyometric, strength and motor control exercises for anterior cruciate ligament injury rehabilitation	No	not applicable	not applicable	No	No	No	Simple dissemination	Text and video	2099	80	1	N/A
596	Instagram	English	Strengthening for weakened muscles, and manual therapy for muscle strain	No	not applicable	not applicable	Yes	No	Yes	Simple dissemination with conflict	Text	30	7	8	N/A
597	Instagram	English	Joint mobilization for hip and low back pain	No	not applicable	not applicable	Yes	Yes	Yes	Self-promotion	Text and video	12400	181	18	N/A
598	Instagram	English	Load control for management of medial tibial stress syndrome	Yes	No	Partial	No	No	No	Facilitated Information	Text and infographic	3787	109	20	N/A
599	Instagram	English	Exercise for low back pain	No	not applicable	not applicable	No	No	No	Simple dissemination	Text and infographic	3129	47	0	N/A
600	Instagram	English	Physiotherapy to treat chronic pain	Yes	No	Partial	Yes	No	Yes	Simple dissemination with conflict	Text and infographic	157	21	1	N/A
601	Instagram	English	Massage therapy to treat different musculoskeletal conditions	No	not applicable	not applicable	Yes	Yes	No	Self-promotion	Text and figure	575	10	0	N/A
602	Instagram	English	Exercise to prevent muscle injury	No	not applicable	not applicable	Yes	Yes	No	Self-promotion	Text and figure	336	8	1	N/A
603	Instagram	English	Exercise to prevent low back pain	No	not applicable	not applicable	No	No	No	Simple dissemination	Text and figure	64	11	0	N/A
604	Instagram	English	Calf strengthening for anterior cruciate ligament injury rehabilitation	No	not applicable	not applicable	No	No	No	Simple dissemination	Text and video	221	19	0	N/A
605	Instagram	English	Electrotherapy and exercise for acute rehabilitation after anterior cruciate ligament reconstruction	No	not applicable	not applicable	Yes	Yes	No	Self-promotion	Text and video	221	18	0	N/A
606	Instagram	English	Thermotherapy for rehabilitation of different conditions	No	not applicable	not applicable	No	No	No	Simple dissemination	Infographic	94	3	0	N/A
607	Instagram	English	Exercise for Parkinson disease rehabilitation	No	not applicable	not applicable	No	No	No	Simple dissemination	Text and figure	100	7	0	N/A
608	Instagram	English	Stretching to improve flexibility, mobility, muscle activation and blood flow, and reduce tension and pain	No	not applicable	not applicable	Yes	Yes	No	Self-promotion	Text and figure	588	15	3	N/A
609	Instagram	English	Manual therapy and kinesiotapingfor knee pain and swelling	No	not applicable	not applicable	Yes	Yes	No	Self-promotion	Text and figure	159	1	1	N/A
610	Instagram	English	Exercise for ankle sprain rehabilitation	No	not applicable	not applicable	No	No	No	Simple dissemination	Text and video	1175	23	1	N/A
611	Instagram	English	Exercise, myofascial release, massage and load control for medial tibial stress syndrome	No	not applicable	not applicable	No	No	No	Simple dissemination	Text and figure	78	13	1	N/A
612	Instagram	English	Exercise for pain rehabilitation	No	not applicable	not applicable	Yes	No	Yes	Simple dissemination with conflict	Text and figure	1985	23	1	N/A
613	Instagram	English	Exercise to increase lumbar mobility	No	not applicable	not applicable	Yes	Yes	No	Self-promotion	Text and video	595	19	0	N/A
614	Instagram	English	Strengthening for shoulder rehabilitation	No	not applicable	not applicable	Yes	Yes	No	Self-promotion	Text and video	595	24	0	N/A
615	Instagram	English	Strengthening for shoulder pain	No	not applicable	not applicable	Yes	Yes	No	Self-promotion	Text and video	595	44	1	N/A
616	Instagram	English	Exercise to prevent knee crepitus	No	not applicable	not applicable	No	No	No	Simple dissemination	Text and infographic	114	6	0	N/A
617	Instagram	English	Kinesiotaping to treat cramps, reduce swelling and pain, and improve blood circulation	No	not applicable	not applicable	No	No	No	Simple dissemination	Text and infographic	388	63	0	N/A
618	Instagram	English	Strengthening and movement adjust for anterior cruciate ligament reconstruction rehabilitation	No	not applicable	not applicable	Yes	Yes	Yes	Self-promotion	Text and video	9442	287	19	N/A
619	Instagram	English	Strengthening to prevent running-related injuries and improve performance	No	not applicable	not applicable	Yes	Yes	No	Self-promotion	Text and video	506	13	2	N/A
620	Instagram	English	Electrotherapy to reduce pain and accelerate healing	No	not applicable	not applicable	No	No	No	Simple dissemination	Text and figure	86	7	0	N/A
621	Instagram	English	Cupping therapy to improve mobility	No	not applicable	not applicable	No	No	No	Simple dissemination	Text and video	193	18	0	N/A
622	Instagram	English	Joint mobilization after surgery for flexor pollicis longus repair	No	not applicable	not applicable	Yes	Yes	No	Self-promotion	Text and video	17446	517	10	N/A
623	Instagram	English	Strength, motor control and plyometric for exercises anterior cruciate ligament injury rehabilitation	No	not applicable	not applicable	No	No	No	Simple dissemination	Text and video	3801	69	4	N/A
624	Instagram	English	Exercise for gluteal muscle activation	No	not applicable	not applicable	No	No	No	Simple dissemination	Text and infographic	1125	39	11	N/A
625	Instagram	English	Exercise for shoulder impingement symdrome rehabilitation	No	not applicable	not applicable	Yes	Yes	No	Self-promotion	Text and figure	343	11	0	N/A
626	Instagram	English	Mobility exercise to reduca pain in the hips and lumbar spine	No	not applicable	not applicable	No	No	No	Simple dissemination	Text and video	1148	30	8	N/A
627	Instagram	English	Stretching and exercise to increase hip mobility	No	not applicable	not applicable	Yes	Yes	Yes	Self-promotion	Text and video	834000	4426	58	N/A
628	Instagram	English	Dry needling to treat trigger points, increase blood flow, relief pain and improve healing	No	not applicable	not applicable	Yes	Yes	Yes	Self-promotion	Text and infographic	877	5	0	N/A
629	Instagram	English	Strength exercise and gradual returno to sport for prevention of second ACL injury	Yes	No	Partial	Yes	No	Yes	Facilitated Information with conflict	Text and infographic	719	6	0	N/A
630	Instagram	English	Joint mobilization with movement to treat pain and restriction in cervical spine	No	not applicable	not applicable	No	No	No	Simple dissemination	Text and video	5204	54	1	N/A
631	Instagram	English	Education to manage acute injury	Yes	No	Accurate	No	No	No	Facilitated Information	Text and infographic	582	35	1	N/A
632	Instagram	English	Exercise to increase quadriceps activation	No	not applicable	not applicable	No	No	No	Simple dissemination	Text and video	133	11	0	N/A

## Sheet: References analysis
	Cited references in the analysed posts
1	Altug Z. lifestyle medicine for chronic lower back pain: an evidence-based approach. Am J Lifestyle Med. 2021;15(4):425-433. doi:10.1177/1559827620971547
	Design	Scale	Score	Quality	Oxford	Altimetric	Citations	Consitency	Selection bias
	Narrative review	N/A	N/A	N/A	N/A	3	0	Accutare	No
2	Anil K, Freeman JA, Buckingham S, et al. Scope, context and quality of telerehabilitation guidelines for physical disabilities: a scoping review. BMJ Open. 2021;11(8):e049603. doi:10.1136/bmjopen-2021-049603
	Design	Scale	Score	Quality	Oxford	Altimetric	Citations	Consitency	Selection bias
	Systematic review	AMSTAR II	6/13	Poor	2a	20	0	Accurate	No
	Detailed AMSTAR Score	1	2	3	4	5	6	7	8	9	10	11	12	13	14	15	16
		No	No	Yes	Yes	Yes	Yes	No	Yes	No	No	N/A	N/A	No	No	N/A	Yes
3	Apfel CC, Cakmakkaya OS, Martin W, et al. Restoration of disk height through non-surgical spinal decompression is associated with decreased discogenic low back pain: a retrospective cohort study. BMC Musculoskelet Disord. 2010;11:155. doi:10.1186/1471-2474-11-155
	Design	Scale	Score	Quality	Oxford	Altimetric	Citations	Consitency	Selection bias
	Cohort study	EIA	26/23	Good	2b	36	25	Accurate	No
	Detailed EIA Score	1	2	3	4	5	6	7	8	9	10	11	12	13	14	15	16	17	18	19	20	21	22	23	24	25	26	27	28	29	30	31	32	33	34	35	36	37	38	39	40	41	42	43
		2	2	2	2	0	2	2	2	0	2	N/A	0	2	2	2	2	2	N/A	0	N/A	0	N/A	N/A	N/A	N/A	N/A	N/A	N/A	N/A	N/A	0	N/A	N/A	N/A	N/A	N/A	0	N/A	N/A	N/A	0	0	0
4	Ashigbi EYK, Banzer W, Niederer D. Return to sport tests’ prognostic value for reinjury risk after anterior cruciate ligament reconstruction: a systematic review. Med Sci Sports Exerc. 2020;52(6):1263-1271. doi:10.1249/MSS.0000000000002246
	Design	Scale	Score	Quality	Oxford	Altimetric	Citations	Consitency	Selection bias
	Systematic review	AMSTAR II	7/13	Poor	2a	3	2	Partial	No
	Detailed AMSTAR Score	1	2	3	4	5	6	7	8	9	10	11	12	13	14	15	16
		No	Yes	Yes	Yes	Yes	No	No	Yes	Yes	No	N/A	N/A	No	No	N/A	Yes
5	Barbosa FC. Fisioterapia: Princípios Fundamentais. 1st ed. Piracanjuba: Conhecimento Livre; 2021.
	Design	Scale	Score	Quality	Oxford	Altimetric	Citations	Consitency	Selection bias
	Book	N/A	N/A	N/A	N/A	N/A	N/A	N/A	N/A
6	Bayer ML, Magnusson SP, Kjaer M, Tendon Research Group Bispebjerg. Early versus Delayed Rehabilitation after Acute Muscle Injury. N Engl J Med. 2017;377(13):1300-1301. doi:10.1056/NEJMc1708134
	Design	Scale	Score	Quality	Oxford	Altimetric	Citations	Consitency	Selection bias
	Randomized controlled trial	PEDro	3/10	Poor	1b	517	29	Partial	No
	Detailed PEDro Score	1	2	3	4	5	6	7	8	9	10	11
		Yes	Yes	No	No	No	No	No	No	No	Yes	Yes
7	Bertiche P, Mohtadi N, Chan D, Hölmich P. Proximal hamstring tendon avulsion: state of the art. J ISAKOS Jt Disord Orthop Sports Med. 2021;6(4):237-246. doi:10.1136/jisakos-2019-000420
	Design	Scale	Score	Quality	Oxford	Altimetric	Citations	Consitency	Selection bias
	Narrative review	N/A	N/A	N/A	N/A	41	0	Accurate	No
8	Boland K, Smith C, Bond H, Briggs S, Walton J. Current concepts in the rehabilitation of rotator cuff related disorders. J Clin Orthop Trauma. 2021;18:13-19. doi:10.1016/j.jcot.2021.04.007
	Design	Scale	Score	Quality	Oxford	Altimetric	Citations	Consitency	Selection bias
	Systematic review	AMSTAR II	3/13	Poor	1a	93	2	Partial	No
	Detailed AMSTAR Score	1	2	3	4	5	6	7	8	9	10	11	12	13	14	15	16
		No	No	Yes	Yes	No	No	No	No	No	No	N/A	N/A	No	No	N/A	Yes
9	Borges M de C, Borges C dos S, Silva AGJ, Castellano LRC, Cardoso FAG. Avaliação da qualidade de vida e do tratamento fisioterapêutico em pacientes com cervicalgia crônica. Fisioter Em Mov. 2013;26:873-881. doi:10.1590/S0103-51502013000400016
	Design	Scale	Score	Quality	Oxford	Altimetric	Citations	Consitency	Selection bias
	Cohort study	EIA	21/25	Poor	2b	1	0	Partial	No
	Detailed EIA Score	1	2	3	4	5	6	7	8	9	10	11	12	13	14	15	16	17	18	19	20	21	22	23	24	25	26	27	28	29	30	31	32	33	34	35	36	37	38	39	40	41	42	43
		2	2	2	0	0	1	0	0	0	0	N/A	N/A	2	2	2	2	0	N/A	0	N/A	0	N/A	N/A	N/A	N/A	N/A	N/A	N/A	N/A	N/A	0	N/A	2	N/A	0	N/A	N/A	2	2	N/A	0	0	0
10	Brennan D, Theodoros D, Association A, et al. A Blueprint for Telerehabilitation Guidelines. Int J Telerehabilitation Vol 2 No 2 Fall 2010 31--34. 2010;2. doi:10.5195/ijt.2010.6063
	Design	Scale	Score	Quality	Oxford	Altimetric	Citations	Consitency	Selection bias
	Handout	N/A	N/A	N/A	N/A	N/A	42	Accurate	No
11	Brennen R, Frawley HC, Martin J, Haines TP. Group-based pelvic floor muscle training for all women during pregnancy is more cost-effective than postnatal training for women with urinary incontinence: cost-effectiveness analysis of a systematic review. J Physiother. 2021;67(2):105-114. doi:10.1016/j.jphys.2021.03.001
	Design	Scale	Score	Quality	Oxford	Altimetric	Citations	Consitency	Selection bias
	Systematic review	AMSTAR II	6/16	Poor	1a	41	2	Partial	No
	Detailed AMSTAR Score	1	2	3	4	5	6	7	8	9	10	11	12	13	14	15	16
		No	No	Yes	Yes	Yes	No	No	Yes	No	No	Yes	No	No	No	No	Yes
12	Buijze GA, De Jong HMY, Kox M, et al. An add-on training program involving breathing exercises, cold exposure, and meditation attenuates inflammation and disease activity in axial spondyloarthritis - A proof of concept trial. PloS One. 2019;14(12):e0225749. doi:10.1371/journal.pone.0225749
	Design	Scale	Score	Quality	Oxford	Altimetric	Citations	Consitency	Selection bias
	Randomized controlled trial	PEDro	6/10	Good	1b	66	7	Accurate	No
	Detailed PEDro Score	1	2	3	4	5	6	7	8	9	10	11
		No	Yes	Yes	Yes	No	No	No	No	Yes	Yes	Yes
13	Bülow K, Lindberg K, Vaegter HB, Juhl CB. Effectiveness of pain neurophysiology education on musculoskeletal pain: a systematic review and meta-analysis. Pain Med Malden Mass. 2021;22(4):891-904. doi:10.1093/pm/pnaa484
	Design	Scale	Score	Quality	Oxford	Altimetric	Citations	Consitency	Selection bias
	Systematic review	AMSTAR II	13/16	Good	1a	24	2	Partial	No
	Detailed AMSTAR Score	1	2	3	4	5	6	7	8	9	10	11	12	13	14	15	16
		No	Yes	Yes	Yes	Yes	Yes	No	Yes	Yes	No	Yes	Yes	Yes	Yes	Yes	Yes
14	Canadian Physiotherapy Association, Allison Francis. Rehabilitation for Clients with Post COVID-19 Condition (Long COVID). https://physiotherapy.ca/rehabilitation-clients-post-covid-19-condition-long-covid
	Design	Scale	Score	Quality	Oxford	Altimetric	Citations	Consitency	Selection bias
	Guideline	AGREE II	23%	Poor	N/A	N/A	N/A	Accurate	No
	Detailed AGREE Score	1	2	3	4	5	6	7	8	Score
		1	1	1	2	5	1	5	3	(19-8)/48
15	Caneiro JP, Alaiti RK, Fukusawa L, Hespanhol L, Brukner P, O’Sullivan PP. There is more to pain than tissue damage: eight principles to guide care of acute non-traumatic pain in sport. Br J Sports Med. 2021;55(2):75-77. doi:10.1136/bjsports-2019-101705
	Design	Scale	Score	Quality	Oxford	Altimetric	Citations	Consitency	Selection bias
	Editorial	N/A	N/A	N/A	5	229	1	Accurate	No
16	Cleland JA, Childs JD, McRae M, Palmer JA, Stowell T. Immediate effects of thoracic manipulation in patients with neck pain: a randomized clinical trial. Man Ther. 2005;10(2):127-135. doi:10.1016/j.math.2004.08.005
	Design	Scale	Score	Quality	Oxford	Altimetric	Citations	Consitency	Selection bias
	Randomized controlled trial	PEDro	8/10	Good	1b	7	199	Accurate	No
	Detailed PEDro Score	1	2	3	4	5	6	7	8	9	10	11
		Yes	Yes	Yes	Yes	Yes	No	Yes	Yes	No	Yes	Yes
17	Comitê Coordenador da Diretriz de Insuficiência Cardíaca, Rohde LEP, Montera MW, et al. Diretriz Brasileira de Insuficiência Cardíaca Crônica e Aguda. Arq Bras Cardiol. 2018;111(3):436-539. doi:10.5935/abc.20180190
	Design	Scale	Score	Quality	Oxford	Altimetric	Citations	Consitency	Selection bias
	Guideline	AGREE II	67%	Poor	N/A	0	62	Accurate	No
	Detailed AGREE Score	1	2	3	4	5	6	7	8	Score
		1	7	7	7	7	7	1	3	(40-8)/48
18	Contim CLV, Santo FH do E, Moretto IG. Applicability of auriculotherapy in cancer patients: an integrative literature review. Rev Esc Enferm U P. 2020;54:e03609. doi:10.1590/S1980-220X2019001503609
	Design	Scale	Score	Quality	Oxford	Altimetric	Citations	Consitency	Selection bias
	Narrative review	N/A	N/A	N/A	N/A	0	1	Partial	No
19	D’Hooghe P, Cruz F, Alkhelaifi K. Return to play after a lateral ligament ankle sprain. Curr Rev Musculoskelet Med. 2020;13(3):281-288. doi:10.1007/s12178-020-09631-1
	Design	Scale	Score	Quality	Oxford	Altimetric	Citations	Consitency	Selection bias
	Narrative review	N/A	N/A	N/A	N/A	9	7	Accurate	No
20	Danielsson A, Horvath A, Senorski C, et al. The mechanism of hamstring injuries - a systematic review. BMC Musculoskelet Disord. 2020;21(1):641. doi:10.1186/s12891-020-03658-8
	Design	Scale	Score	Quality	Oxford	Altimetric	Citations	Consitency	Selection bias
	Systematic review	AMSTAR II	5/13	Poor	2a	30	8	Accurate	No
	Detailed AMSTAR Score	1	2	3	4	5	6	7	8	9	10	11	12	13	14	15	16
		No	No	No	Yes	Yes	No	No	Yes	Yes	No	N/A	N/A	No	No	N/A	Yes
21	Di Stasi SL, Logerstedt D, Gardinier ES, Snyder-Mackler L. Gait patterns differ between ACL-reconstructed athletes who pass return-to-sport criteria and those who fail. Am J Sports Med. 2013;41(6):1310-1318. doi:10.1177/0363546513482718
	Design	Scale	Score	Quality	Oxford	Altimetric	Citations	Consitency	Selection bias
	Cross-sectional study	EIA	20/24	Poor	N/A	41	141	Partial	No
	Detailed EIA Score	1	2	3	4	5	6	7	8	9	10	11	12	13	14	15	16	17	18	19	20	21	22	23	24	25	26	27	28	29	30	31	32	33	34	35	36	37	38	39	40	41	42	43
		2	N/A	2	2	0	2	0	2	N/A	N/A	N/A	N/A	2	2	2	2	0	0	0	0	0	N/A	N/A	N/A	N/A	N/A	N/A	N/A	0	N/A	0	N/A	2	0	N/A	N/A	0	N/A	N/A	N/A	0	0	0
22	Diener I, Kargela M, Louw A. Listening is therapy: Patient interviewing from a pain science perspective. Physiother Theory Pract. 2016;32(5):356-367. doi:10.1080/09593985.2016.1194648
	Design	Scale	Score	Quality	Oxford	Altimetric	Citations	Consitency	Selection bias
	Narrative review	N/A	N/A	N/A	N/A	85	23	Partial	No
23	Diniz V, Vial A, Alves R. Effectiveness of blood irradiation by modified intravenous laser (ILIB) on the clinical parameters of fibromyalgia. GSC Adv Res Rev. 2021;7:052-058. doi:10.30574/gscarr.2021.7.1.0023
	Design	Scale	Score	Quality	Oxford	Altimetric	Citations	Consitency	Selection bias
	Case study	N/A	N/A	N/A	4	N/A	N/A	Partial	Yes
24	Diracoglu D, Aydin R, Baskent A, Celik A. Effects of kinesthesia and balance exercises in knee osteoarthritis. J Clin Rheumatol. 2005;11(6):303-310. doi:10.1097/01.rhu.0000191213.37853.3d
	Design	Scale	Score	Quality	Oxford	Altimetric	Citations	Consitency	Selection bias
	Randomized controlled trial	PEDro	4/10	Poor	1b	6	98	Partial	No
	Detailed PEDro Score	1	2	3	4	5	6	7	8	9	10	11
		No	No	No	Yes	No	No	Yes	Yes	No	Yes	No
25	Dubois B, Esculier JF. Soft-tissue injuries simply need PEACE and LOVE. Br J Sports Med. 2020;54(2):72-73. doi:10.1136/bjsports-2019-101253
	Design	Scale	Score	Quality	Oxford	Altimetric	Citations	Consitency	Selection bias
	Editorial	N/A	N/A	N/A	5	572	10	Accurate	No
26	Eckner JT, Oh YK, Joshi MS, Richardson JK, Ashton-Miller JA. Effect of neck muscle strength and anticipatory cervical muscle activation on the kinematic response of the head to impulsive loads. Am J Sports Med. 2014;42(3):566-576. doi:10.1177/0363546513517869
	Design	Scale	Score	Quality	Oxford	Altimetric	Citations	Consitency	Selection bias
	Cross-sectional study	EIA	20/22	Poor	N/A	21	96	Partial	No
	Detailed EIA Score	1	2	3	4	5	6	7	8	9	10	11	12	13	14	15	16	17	18	19	20	21	22	23	24	25	26	27	28	29	30	31	32	33	34	35	36	37	38	39	40	41	42	43
		2	N/A	2	0	0	0	0	1	N/A	N/A	N/A	N/A	2	2	2	2	0	1	0	0	0	N/A	N/A	N/A	N/A	N/A	N/A	N/A	N/A	N/A	2	N/A	2	0	N/A	N/A	N/A	N/A	N/A	N/A	0	0	2
27	Fernandes J. Fisioterapia nas lesões ligamentares no joelho do atleta de futebol. Undergraduate Thesis. Associação Caruaruense de Ensino Superior; 2016.
	Design	Scale	Score	Quality	Oxford	Altimetric	Citations	Consitency	Selection bias
	Undergraduate thesis	N/A	N/A	N/A	N/A	N/A	N/A	N/A	N/A
28	Filipovic A, Kleinöder H, Dörmann U, Mester J. Electromyostimulation--a systematic review of the effects of different electromyostimulation methods on selected strength parameters in trained and elite athletes. J Strength Cond Res. 2012;26(9):2600-2614. doi:10.1519/JSC.0b013e31823f2cd1
	Design	Scale	Score	Quality	Oxford	Altimetric	Citations	Consitency	Selection bias
	Systematic review	AMSTAR II	3/13	Poor	2a	63	63	Partial	No
	Detailed AMSTAR Score	1	2	3	4	5	6	7	8	9	10	11	12	13	14	15	16
		Yes	No	Yes	No	No	No	No	Yes	No	No	N/A	N/A	No	No	N/A	No
29	Fu T, Jiang L, Peng Y, et al. Electrical muscle stimulation accelerates functional recovery after nerve injury. Neuroscience. 2020;426:179-188. doi:10.1016/j.neuroscience.2019.10.052
	Design	Scale	Score	Quality	Oxford	Altimetric	Citations	Consitency	Selection bias
	Animal model study	N/A	N/A	N/A	N/A	1	5	Partial	No
30	Gaebler C, Kukla C, Breitenseher MJ, et al. Diagnosis of lateral ankle ligament injuries. Comparison between talar tilt, MRI and operative findings in 112 athletes. Acta Orthop Scand. 1997;68(3):286-290. doi:10.3109/17453679708996703
	Design	Scale	Score	Quality	Oxford	Altimetric	Citations	Consitency	Selection bias
	Diagnostic study	N/A	N/A	N/A	N/A	0	42	Partial	No
31	Galbraith RM, Lavallee ME. Medial tibial stress syndrome: conservative treatment options. Curr Rev Musculoskelet Med. 2009;2(3):127-133. doi:10.1007/s12178-009-9055-6
	Design	Scale	Score	Quality	Oxford	Altimetric	Citations	Consitency	Selection bias
	Narrative review	N/A	N/A	N/A	N/A	36	39	Partial	No
32	George SZ, Goode AP. Physical therapy and opioid use for musculoskeletal pain management: competitors or companions? Pain Rep. 2020;5(5):e827. doi:10.1097/PR9.0000000000000827
	Design	Scale	Score	Quality	Oxford	Altimetric	Citations	Consitency	Selection bias
	Narrative review	N/A	N/A	N/A	N/A	17	N/A	Partial	No
33	Ghosh M, Nosaka K, Whitehead L, Nosaka K. Identifying key elements to assess patient’s acceptability of neurorehabilitation in stroke survivors - a Delphi method. Disabil Rehabil. Published online August 12, 2021:1-9. doi:10.1080/09638288.2021.1960438
	Design	Scale	Score	Quality	Oxford	Altimetric	Citations	Consitency	Selection bias
	Cross-sectional study	EIA	Assessment was not possible		N/A	1	0	Accurate	No
34	Goodwin VA, Allan L, Bethel A, et al. Rehabilitation to enable recovery from COVID-19: a rapid systematic review. Physiotherapy. 2021;111:4-22. doi:10.1016/j.physio.2021.01.007
	Design	Scale	Score	Quality	Oxford	Altimetric	Citations	Consitency	Selection bias
	Systematic review	AMSTAR II	6/13	Poor	2a	203	5	Accurate	No
	Detailed AMSTAR Score	1	2	3	4	5	6	7	8	9	10	11	12	13	14	15	16
		No	Yes	Yes	Yes	No	No	No	Yes	Yes	No	N/A	N/A	No	No	N/A	Yes
35	Grindem H, Snyder-Mackler L, Moksnes H, Engebretsen L, Risberg MA. Simple decision rules can reduce reinjury risk by 84% after ACL reconstruction: the Delaware-Oslo ACL cohort study. Br J Sports Med. 2016;50(13):804-808. doi:10.1136/bjsports-2016-096031
	Design	Scale	Score	Quality	Oxford	Altimetric	Citations	Consitency	Selection bias
	Cohort study	EIA	30/23	Good	2b	1259	417	Partial	No
	Detailed EIA Score	1	2	3	4	5	6	7	8	9	10	11	12	13	14	15	16	17	18	19	20	21	22	23	24	25	26	27	28	29	30	31	32	33	34	35	36	37	38	39	40	41	42	43
		2	2	2	0	0	2	2	2	0	0	N/A	0	2	2	2	2	0	N/A	2	N/A	0	N/A	N/A	N/A	N/A	N/A	N/A	2	N/A	N/A	2	N/A	N/A	N/A	N/A	N/A	0	N/A	N/A	N/A	N/A	2	2
36	Gumaa M, Rehan Youssef A. Is virtual reality effective in orthopedic rehabilitation? A systematic review and meta-analysis. Phys Ther. 2019;99(10):1304-1325. doi:10.1093/ptj/pzz093
	Design	Scale	Score	Quality	Oxford	Altimetric	Citations	Consitency	Selection bias
	Systematic review	AMSTAR II	10/16	Good	1a	13	20	Partial	No
	Detailed AMSTAR Score	1	2	3	4	5	6	7	8	9	10	11	12	13	14	15	16
		No	Yes	Yes	Yes	Yes	No	No	Yes	Yes	No	Yes	No	Yes	Yes	No	Yes
37	Gunnes M, Langhammer B, Aamot IL, et al. adherence to a long-term physical activity and exercise program after stroke applied in a randomized controlled trial. Phys Ther. 2019;99(1):74-85. doi:10.1093/ptj/pzy126
	Design	Scale	Score	Quality	Oxford	Altimetric	Citations	Consitency	Selection bias
	Cohort study	EIA	30/24	Good	2b	1	7	Accurate	No
	Detailed EIA Score	1	2	3	4	5	6	7	8	9	10	11	12	13	14	15	16	17	18	19	20	21	22	23	24	25	26	27	28	29	30	31	32	33	34	35	36	37	38	39	40	41	42	43
		2	2	2	2	0	2	2	2	0	0	N/A	0	2	2	2	2	0	N/A	2	N/A	0	N/A	N/A	N/A	N/A	N/A	N/A	2	N/A	N/A	0	N/A	N/A	N/A	N/A	N/A	0	N/A	N/A	N/A	0	2	2
38	Harøy J, Pope D, Clarsen B, et al. Infographic. The adductor strengthening programme prevents groin problems among male football players. Br J Sports Med. 2019;53(1):45-46. doi:10.1136/bjsports-2018-099993
	Design	Scale	Score	Quality	Oxford	Altimetric	Citations	Consitency	Selection bias
	Randomized controlled trial	PEDro	7/10	Good	1b	640	46	Accurate	No
	Detailed PEDro Score	1	2	3	4	5	6	7	8	9	10	11
		Yes	Yes	Yes	Yes	No	No	Yes	No	Yes	Yes	Yes
39	Huffer D, Hing W, Newton R, Clair M. Strength training for plantar fasciitis and the intrinsic foot musculature: A systematic review. Phys Ther Sport. 2017;24:44-52. doi:10.1016/j.ptsp.2016.08.008
	Design	Scale	Score	Quality	Oxford	Altimetric	Citations	Consitency	Selection bias
	Systematic review	AMSTAR II	5/13	Poor	2a	94	29	Accurate	No
	Detailed AMSTAR Score	1	2	3	4	5	6	7	8	9	10	11	12	13	14	15	16
		No	Yes	No	Yes	No	No	No	Yes	Yes	No	N/A	N/A	No	No	N/A	Yes
40	Ithurburn MP, Paterno MV, Ford KR, Hewett TE, Schmitt LC. Young athletes with quadriceps femoris strength asymmetry at return to sport after anterior cruciate ligament reconstruction demonstrate asymmetric single-leg drop-landing mechanics. Am J Sports Med. 2015;43(11):2727-2737. doi:10.1177/0363546515602016
	Design	Scale	Score	Quality	Oxford	Altimetric	Citations	Consitency	Selection bias
	Cross-sectional study	EIA	28/24	Good	N/A	52	112	Partial	No
	Detailed EIA Score	1	2	3	4	5	6	7	8	9	10	11	12	13	14	15	16	17	18	19	20	21	22	23	24	25	26	27	28	29	30	31	32	33	34	35	36	37	38	39	40	41	42	43
		2	N/A	2	2	2	2	0	2	N/A	N/A	N/A	N/A	2	2	2	2	0	2	0	0	0	N/A	N/A	N/A	N/A	N/A	N/A	N/A	0	N/A	0	N/A	2	0	N/A	N/A	0	N/A	N/A	N/A	2	0	2
41	Karunakaran KK, Gute S, Ames GR, Chervin K, Dandola CM, Nolan KJ. Effect of robotic exoskeleton gait training during acute stroke on functional ambulation. NeuroRehabilitation. 2021;48(4):493-503. doi:10.3233/NRE-210010
	Design	Scale	Score	Quality	Oxford	Altimetric	Citations	Consitency	Selection bias
	Cohort study	EIA	18/23	Poor	2b	1	0	Partial	No
	Detailed EIA Score	1	2	3	4	5	6	7	8	9	10	11	12	13	14	15	16	17	18	19	20	21	22	23	24	25	26	27	28	29	30	31	32	33	34	35	36	37	38	39	40	41	42	43
		2	2	2	0	0	2	0	2	0	0	N/A	0	2	2	2	2	0	N/A	0	N/A	0	N/A	N/A	N/A	N/A	N/A	N/A	N/A	N/A	N/A	0	N/A	N/A	N/A	N/A	N/A	0	N/A	N/A	N/A	0	0	0
42	Kim HJ, Lee S. Effects of pain neuroscience education on kinesiophobia in patients with chronic pain: a systematic review and meta-analysis. Phys Ther Rehabil Sci. 2020;9:309-317. doi:10.14474/ptrs.2020.9.4.309
	Design	Scale	Score	Quality	Oxford	Altimetric	Citations	Consitency	Selection bias
	Systematic review	AMSTAR II	10/16	Poor	1a	N/A	N/A	Accurate	No
	Detailed AMSTAR Score	1	2	3	4	5	6	7	8	9	10	11	12	13	14	15	16
		No	Yes	Yes	Yes	Yes	Yes	No	Yes	Yes	No	Yes	No	No	No	Yes	Yes
43	Kolk A, Overbeek CL, de Witte PB, et al. Kinematics and muscle activation in subacromial pain syndrome patients and asymptomatic controls. Clin Biomech. 2021;89:105483. doi:10.1016/j.clinbiomech.2021.105483
	Design	Scale	Score	Quality	Oxford	Altimetric	Citations	Consitency	Selection bias
	Cross-sectional study	EIA	29/23	Good	N/A	2	0	Partial	No
	Detailed EIA Score	1	2	3	4	5	6	7	8	9	10	11	12	13	14	15	16	17	18	19	20	21	22	23	24	25	26	27	28	29	30	31	32	33	34	35	36	37	38	39	40	41	42	43
		2	N/A	2	2	2	2	0	2	N/A	N/A	N/A	N/A	2	2	2	2	2	2	0	0	0	N/A	N/A	N/A	N/A	N/A	N/A	N/A	0	N/A	0	N/A	2	0	N/A	N/A	N/A	N/A	N/A	N/A	0	0	2
44	Kox M, Stoffels M, Smeekens SP, et al. The influence of concentration/meditation on autonomic nervous system activity and the innate immune response: a case study. Psychosom Med. 2012;74(5):489-494. doi:10.1097/PSY.0b013e3182583c6d
	Design	Scale	Score	Quality	Oxford	Altimetric	Citations	Consitency	Selection bias
	Case study	N/A	N/A	N/A	4	93	29	Accurate	No
45	Kox M, van Eijk LT, Zwaag J, et al. Voluntary activation of the sympathetic nervous system and attenuation of the innate immune response in humans. Proc Natl Acad Sci U S A. 2014;111(20):7379-7384. doi:10.1073/pnas.1322174111
	Design	Scale	Score	Quality	Oxford	Altimetric	Citations	Consitency	Selection bias
	Randomized controlled trial	PEDro	4/10	Poor	1b	1122	116	Accurate	No
	Detailed PEDro Score	1	2	3	4	5	6	7	8	9	10	11
		Yes	Yes	No	Yes	No	No	No	No	No	Yes	Yes
46	Lafrance S, Ouellet P, Alaoui R, et al. Motor control exercises compared to strengthening exercises for upper- and lower-extremity musculoskeletal disorders: a systematic review with meta-analyses of randomized controlled trials. Phys Ther. 2021;101(7):pzab072. doi:10.1093/ptj/pzab072
	Design	Scale	Score	Quality	Oxford	Altimetric	Citations	Consitency	Selection bias
	Systematic review	AMSTAR II	Assessment was not possible		1a	100	0	Partial	No
47	Lee J, Cho JH, Kim KW, et al. Chuna manual therapy vs usual care for patients with nonspecific chronic neck pain: a randomized clinical trial. JAMA Netw Open. 2021;4(7):e2113757. doi:10.1001/jamanetworkopen.2021.13757
	Design	Scale	Score	Quality	Oxford	Altimetric	Citations	Consitency	Selection bias
	Randomized controlled trial	PEDro	8/10	Good	1b	4	2	Partial	No
	Detailed PEDro Score	1	2	3	4	5	6	7	8	9	10	11
		Yes	Yes	Yes	Yes	No	No	Yes	Yes	Yes	Yes	Yes
48	Lemes IR, Pinto RZ, Lage VN, et al. Do exercise-based prevention programmes reduce non-contact musculoskeletal injuries in football (soccer)? A systematic review and meta-analysis with 13 355 athletes and more than 1 million exposure hours. Br J Sports Med. 2021;55(20):1170-1178. doi:10.1136/bjsports-2020-103683
	Design	Scale	Score	Quality	Oxford	Altimetric	Citations	Consitency	Selection bias
	Systematic review	AMSTAR II	13/16	Good	1a	147	1	Accurate	No
	Detailed AMSTAR Score	1	2	3	4	5	6	7	8	9	10	11	12	13	14	15	16
		Yes	Yes	Yes	Yes	Yes	Yes	No	Yes	Yes	No	Yes	Yes	Yes	Yes	No	Yes
49	Leonard R, Sweeney J, Damiano D, Bjornson K, Ries J. Effects of orthoses on standing postural control and muscle activity in children with cerebral palsy. Pediatr Phys Ther. 2021;33(3):129-135. doi:10.1097/PEP.0000000000000802
	Design	Scale	Score	Quality	Oxford	Altimetric	Citations	Consitency	Selection bias
	Cross-sectional study	EIA	16/19	Poor	3b	2	0	Accurate	No
	Detailed EIA Score	1	2	3	4	5	6	7	8	9	10	11	12	13	14	15	16	17	18	19	20	21	22	23	24	25	26	27	28	29	30	31	32	33	34	35	36	37	38	39	40	41	42	43
		2	N/A	2	2	0	2	0	2	N/A	N/A	N/A	N/A	2	2	0	2	0	N/A	0	N/A	0	N/A	N/A	N/A	N/A	N/A	N/A	N/A	N/A	N/A	0	N/A	N/A	N/A	N/A	N/A	0	N/A	N/A	N/A	0	0	0
50	Lewis CL, Foley HD, Lee TS, Berry JW. Hip-muscle activity in men and women during resisted side stepping with different band positions. J Athl Train. 2018;53(11):1071-1081. doi:10.4085/1062-6050-46-16
	Design	Scale	Score	Quality	Oxford	Altimetric	Citations	Consitency	Selection bias
	Cross-sectional study	EIA	20/18	Good	N/A	498	5	Accurate	No
	Detailed EIA Score	1	2	3	4	5	6	7	8	9	10	11	12	13	14	15	16	17	18	19	20	21	22	23	24	25	26	27	28	29	30	31	32	33	34	35	36	37	38	39	40	41	42	43
		2	N/A	2	2	0	2	0	2	N/A	N/A	N/A	N/A	2	2	2	2	0	N/A	0	N/A	0	N/A	N/A	N/A	N/A	N/A	N/A	N/A	N/A	N/A	0	N/A	N/A	N/A	N/A	N/A	N/A	N/A	N/A	N/A	0	0	2
51	Lohrer H, Malliaropoulos N, Korakakis V, Padhiar N. Exercise-induced leg pain in athletes: diagnostic, assessment, and management strategies. Phys Sportsmed. 2019;47(1):47-59. doi:10.1080/00913847.2018.1537861
	Design	Scale	Score	Quality	Oxford	Altimetric	Citations	Consitency	Selection bias
	Narrative review	N/A	N/A	N/A	N/A	1	13	Partial	No
52	Lopez-Leon S, Wegman-Ostrosky T, Perelman C, et al. More than 50 Long-term effects of COVID-19: a systematic review and meta-analysis. MedRxiv Prepr Serv Health Sci. Published online January 30, 2021:2021.01.27.21250617. doi:10.1101/2021.01.27.21250617
	Design	Scale	Score	Quality	Oxford	Altimetric	Citations	Consitency	Selection bias
	Systematic review	AMSTAR II	9/16	Poor	2a	5188	75	Partial	No
	Detailed AMSTAR Score	1	2	3	4	5	6	7	8	9	10	11	12	13	14	15	16
		Yes	No	Yes	Yes	Yes	Yes	No	Yes	Yes	No	Yes	No	No	No	No	Yes
53	Martins J, Reis L, Andrade F. PROFISIO - Programa de Atualização em Fisioterapia: Terapia Intensiva Adulto. 1st ed. Porto Alegre: Artmed, 2019.
	Design	Scale	Score	Quality	Oxford	Altimetric	Citations	Consitency	Selection bias
	Book	N/A	N/A	N/A	N/A	N/A	N/A	N/A	N/A
54	Mendiguchia J, Castaño-Zambudio A, Jiménez-Reyes P, et al. Can We Modify Maximal Speed Running Posture? Implications for Performance and Hamstring Injury Management. Int J Sports Physiol Perform. 2022;17(3):374-383. doi:10.1123/ijspp.2021-0107
	Design	Scale	Score	Quality	Oxford	Altimetric	Citations	Consitency	Selection bias
	Randomized controlled trial	PEDro	4/10	Poor	2b	N/A	N/A	Accurate	No
	Detailed PEDro Score	1	2	3	4	5	6	7	8	9	10	11
		Yes	No	No	Yes	No	No	No	Yes	No	Yes	Yes
55	Merino-Andrés J, García de Mateos-López A, Damiano DL, Sánchez-Sierra A. Effect of muscle strength training in children and adolescents with spastic cerebral palsy: A systematic review and meta-analysis. Clin Rehabil. 2022;36(1):4-14. doi:10.1177/02692155211040199
	Design	Scale	Score	Quality	Oxford	Altimetric	Citations	Consitency	Selection bias
	Systematic review	AMSTAR II	11/16	Good	1a	37	0	Accurate	No
	Detailed AMSTAR Score	1	2	3	4	5	6	7	8	9	10	11	12	13	14	15	16
		No	Yes	Yes	Yes	No	Yes	No	Yes	Yes	No	Yes	Yes	Yes	Yes	No	Yes
56	Merlo AP, Ferlito JV, Marchi TD. Fortalecimento muscular através do método kaatsu de treinamento: uma revisão sistemática. Rev Inspirar. 2020;20(3):22.
	Design	Scale	Score	Quality	Oxford	Altimetric	Citations	Consitency	Selection bias
	Systematic review	AMSTAR II	3/13	Poor	2a	0	0	Accurate	No
	Detailed AMSTAR Score	1	2	3	4	5	6	7	8	9	10	11	12	13	14	15	16
		No	No	No	Yes	No	No	No	Yes	Yes	No	N/A	N/A	No	No	N/A	No
57	Mertens MG, Meert L, Struyf F, Schwank A, Meeus M. exercise therapy is effective for improvement in range of motion, function, and pain in patients with frozen shoulder: a systematic review and meta-analysis. Arch Phys Med Rehabil. 2022;103(5):998-1012.e14. doi:10.1016/j.apmr.2021.07.806
	Design	Scale	Score	Quality	Oxford	Altimetric	Citations	Consitency	Selection bias
	Systematic review	AMSTAR II	12/16	Good	1a	66	0	Accurate	No
	Detailed AMSTAR Score	1	2	3	4	5	6	7	8	9	10	11	12	13	14	15	16
		Yes	No	Yes	Yes	Yes	Yes	No	Yes	Yes	No	Yes	Yes	Yes	Yes	No	Yes
58	Montalvo AM, Cara EL, Myer GD. Effect of kinesiology taping on pain in individuals with musculoskeletal injuries: systematic review and meta-analysis. Phys Sportsmed. 2014;42(2):48-57. doi:10.3810/psm.2014.05.2057
	Design	Scale	Score	Quality	Oxford	Altimetric	Citations	Consitency	Selection bias
	Systematic review	AMSTAR II	5/16	Poor	2a	136	63	Inaccurate	Yes
	Detailed AMSTAR Score	1	2	3	4	5	6	7	8	9	10	11	12	13	14	15	16
		No	No	Yes	Yes	No	No	No	Yes	Yes	No	No	No	No	No	No	Yes
59	Moraes J, Braga J, Santos A, et al. The use of phonophoresis in pain and functionality in individuals with knee osteoarthritis: A review of the scope. Res Soc Dev. 2021;10:e57210817522. doi:10.33448/rsd-v10i8.17522
	Design	Scale	Score	Quality	Oxford	Altimetric	Citations	Consitency	Selection bias
	Systematic review	AMSTAR II	4/13	Poor	2a	0	0	Accurate	No
	Detailed AMSTAR Score	1	2	3	4	5	6	7	8	9	10	11	12	13	14	15	16
		No	No	No	Yes	Yes	No	No	Yes	Yes	No	N/A	N/A	No	No	N/A	No
60	Mu J, Furlan AD, Lam WY, Hsu MY, Ning Z, Lao L. Acupuncture for chronic nonspecific low back pain. Cochrane Database Syst Rev. 2020;12:CD013814. doi:10.1002/14651858.CD013814
	Design	Scale	Score	Quality	Oxford	Altimetric	Citations	Consitency	Selection bias
	Systematic review	AMSTAR II	16/16	Good	1a	244	8	Accurate	No
	Detailed AMSTAR Score	1	2	3	4	5	6	7	8	9	10	11	12	13	14	15	16
		Yes	Yes	Yes	Yes	Yes	Yes	Yes	Yes	Yes	Yes	Yes	Yes	Yes	Yes	Yes	Yes
61	Mulvad B, Nielsen RO, Lind M, Ramskov D. Diagnoses and time to recovery among injured recreational runners in the RUN CLEVER trial. PloS One. 2018;13(10):e0204742. doi:10.1371/journal.pone.0204742
	Design	Scale	Score	Quality	Oxford	Altimetric	Citations	Consitency	Selection bias
	Cohort study	EIA	24/25	Poor	2b	N/A	10	Partial	No
	Detailed EIA Score	1	2	3	4	5	6	7	8	9	10	11	12	13	14	15	16	17	18	19	20	21	22	23	24	25	26	27	28	29	30	31	32	33	34	35	36	37	38	39	40	41	42	43
		2	2	2	2	0	2	0	0	0	N/A	N/A	0	2	2	2	2	0	N/A	0	N/A	0	N/A	N/A	N/A	N/A	N/A	N/A	2	N/A	N/A	0	N/A	N/A	N/A	0	N/A	0	2	N/A	N/A	0	0	2
62	Nakaya Y, Akamatsu M, Ogimoto A, Kitaoka H. Early cardiac rehabilitation for acute decompensated heart failure safely improves physical function (PEARL study): a randomized controlled trial. Eur J Phys Rehabil Med. 2021;57(6):985-993. doi:10.23736/S1973-9087.21.06727-7
	Design	Scale	Score	Quality	Oxford	Altimetric	Citations	Consitency	Selection bias
	Randomized controlled trial	PEDro	5/10	Poor	1b	N/A	N/A	Accurate	No
	Detailed PEDro Score	1	2	3	4	5	6	7	8	9	10	11
		Yes	Yes	No	Yes	No	No	No	Yes	No	Yes	Yes
63	Nascimento R, Braga J, Moraes J, Silva N, da Silva T, Oliveira A. The effectiveness of iontophoresis in wound recovery: A scope review. Res Soc Dev. 2021;10:e17310817163. doi:10.33448/rsd-v10i8.17163
	Design	Scale	Score	Quality	Oxford	Altimetric	Citations	Consitency	Selection bias
	Systematic review	AMSTAR II	4/13	Poor	2a	0	0	Accurate	No
	Detailed AMSTAR Score	1	2	3	4	5	6	7	8	9	10	11	12	13	14	15	16
		No	No	No	Yes	Yes	No	No	Yes	Yes	No	N/A	N/A	No	No	N/A	No
64	Navarro RA, Adams AL, Lin CC, et al. does knee arthroscopy for treatment of meniscal damage with osteoarthritis delay knee replacement compared to physical therapy alone? Clin Orthop Surg. 2020;12(3):304-311. doi:10.4055/cios19114
	Design	Scale	Score	Quality	Oxford	Altimetric	Citations	Consitency	Selection bias
	Cohort study	EIA	38/29	Good	2b	67	1	Accurate	No
	Detailed EIA Score	1	2	3	4	5	6	7	8	9	10	11	12	13	14	15	16	17	18	19	20	21	22	23	24	25	26	27	28	29	30	31	32	33	34	35	36	37	38	39	40	41	42	43
		2	2	2	2	2	2	2	2	0	0	N/A	0	2	2	2	2	0	0	0	2	0	N/A	N/A	N/A	N/A	N/A	N/A	2	0	N/A	0	N/A	2	N/A	N/A	N/A	0	2	N/A	N/A	2	2	2
65	Nery M, Natour J, Jennings F, Fernandes A da RC, Souza MC, Jones A. Effects of a progressive resistance exercise program in patients with hand osteoarthritis: A randomized, controlled trial with a blinded assessor. Clin Rehabil. 2021;35(12):1757-1767. doi:10.1177/02692155211030622
	Design	Scale	Score	Quality	Oxford	Altimetric	Citations	Consitency	Selection bias
	Randomized controlled trial	PEDro	8/10	Good	1b	17	0	Accurate	No
	Detailed PEDro Score	1	2	3	4	5	6	7	8	9	10	11
		Yes	Yes	Yes	Yes	No	No	Yes	Yes	Yes	Yes	Yes
66	Nielsen RO, Rønnow L, Rasmussen S, Lind M. A prospective study on time to recovery in 254 injured novice runners. PloS One. 2014;9(6):e99877. doi:10.1371/journal.pone.0099877
	Design	Scale	Score	Quality	Oxford	Altimetric	Citations	Consitency	Selection bias
	Cohort study	EIA	24/25	Poor	2b	34	41	Partial	No
	Detailed EIA Score	1	2	3	4	5	6	7	8	9	10	11	12	13	14	15	16	17	18	19	20	21	22	23	24	25	26	27	28	29	30	31	32	33	34	35	36	37	38	39	40	41	42	43
		2	2	2	2	0	2	0	0	0	N/A	N/A	0	2	2	2	2	0	N/A	0	N/A	0	N/A	N/A	N/A	N/A	N/A	N/A	2	N/A	N/A	0	N/A	N/A	N/A	0	N/A	0	2	N/A	N/A	0	0	2
67	Nunes GS, Feldkircher JM, Tessarin BM, Bender PU, da Luz CM, de Noronha M. Kinesio taping does not improve ankle functional or performance in people with or without ankle injuries: Systematic review and meta-analysis. Clin Rehabil. 2021;35(2):182-199. doi:10.1177/0269215520963846
	Design	Scale	Score	Quality	Oxford	Altimetric	Citations	Consitency	Selection bias
	Systematic review	AMSTAR II	14/16	Good	1a	314	0	Accurate	No
	Detailed AMSTAR Score	1	2	3	4	5	6	7	8	9	10	11	12	13	14	15	16
		Yes	Yes	Yes	Yes	Yes	Yes	No	Yes	Yes	Yes	Yes	Yes	Yes	Yes	No	Yes
68	Núñez JF, Fernandez I, Torres A, et al. Strength conditioning program to prevent adductor muscle strains in football: does it really help professional football players? Int J Environ Res Public Health. 2020;17(17):E6408. doi:10.3390/ijerph17176408
	Design	Scale	Score	Quality	Oxford	Altimetric	Citations	Consitency	Selection bias
	Cohort study	EIA	29/32	Poor	2b	1	1	Accurate	No
	Detailed EIA Score	1	2	3	4	5	6	7	8	9	10	11	12	13	14	15	16	17	18	19	20	21	22	23	24	25	26	27	28	29	30	31	32	33	34	35	36	37	38	39	40	41	42	43
		2	2	2	1	2	0	0	0	0	0	N/A	N/A	2	2	2	2	0	0	0	2	0	N/A	N/A	N/A	N/A	N/A	2	2	0	0	0	N/A	2	2	0	N/A	0	2	N/A	N/A	0	0	0
69	Pai MYB, Toma JT, Kaziyama HHS, et al. Dry needling has lasting analgesic effect in shoulder pain: a double-blind, sham-controlled trial. Pain Rep. 2021;6(2):e939. doi:10.1097/PR9.0000000000000939
	Design	Scale	Score	Quality	Oxford	Altimetric	Citations	Consitency	Selection bias
	Randomized controlled trial	PEDro	8/10	Good	1b	29	0	Accurate	No
	Detailed PEDro Score	1	2	3	4	5	6	7	8	9	10	11
		Yes	Yes	No	Yes	Yes	No	Yes	Yes	Yes	Yes	Yes
70	Pérez-Gómez J, Villafaina S, Adsuar JC, Carlos-Vivas J, Garcia-Gordillo MÁ, Collado-Mateo D. Copenhagen adduction exercise to increase eccentric strength: a systematic review and meta-analysis. Appl Sci. 2020;10(8):2863. doi:10.3390/app10082863
	Design	Scale	Score	Quality	Oxford	Altimetric	Citations	Consitency	Selection bias
	Systematic review	AMSTAR II	8/16	Poor	1a	14	1	Accurate	No
	Detailed AMSTAR Score	1	2	3	4	5	6	7	8	9	10	11	12	13	14	15	16
		No	No	Yes	Yes	Yes	Yes	No	Yes	No	No	Yes	Yes	No	No	No	Yes
71	Perry S, Billek B, Schreiber J. Stroke prevention: education and barriers for physical and occupational therapists caring for older adults. Phys Occup Ther Geriatr. 2020;38:1-17. doi:10.1080/02703181.2020.1755410
	Design	Scale	Score	Quality	Oxford	Altimetric	Citations	Consitency	Selection bias
	Cross-sectional study	EIA	22/19	Good	N/A	0	0	Accurate	No
	Detailed EIA Score	1	2	3	4	5	6	7	8	9	10	11	12	13	14	15	16	17	18	19	20	21	22	23	24	25	26	27	28	29	30	31	32	33	34	35	36	37	38	39	40	41	42	43
		2	N/A	2	2	2	2	0	2	N/A	N/A	N/A	N/A	2	2	2	2	0	N/A	0	N/A	0	N/A	N/A	N/A	N/A	N/A	N/A	N/A	N/A	N/A	0	N/A	N/A	2	N/A	N/A	N/A	N/A	N/A	N/A	0	0	0
72	Peter WF, Swart NM, Meerhoff GA, Vliet Vlieland TPM. clinical practice guideline for physical therapist management of people with rheumatoid arthritis. Phys Ther. 2021;101(8):pzab127. doi:10.1093/ptj/pzab127
	Design	Scale	Score	Quality	Oxford	Altimetric	Citations	Consitency	Selection bias
	Guideline	AGREE II	96%	Good	N/A	28	0	Accurate	No
	Detailed AGREE Score	1	2	3	4	5	6	7	8	Score
		7	7	7	7	7	6	7	6	(54-8)/48
73	Plaza-Manzano G, Cancela-Cilleruelo I, Fernández-de-Las-Peñas C, et al. Effects of adding a neurodynamic mobilization to motor control training in patients with lumbar radiculopathy due to disc herniation: a randomized clinical trial. Am J Phys Med Rehabil. 2020;99(2):124-132. doi:10.1097/PHM.0000000000001295
	Design	Scale	Score	Quality	Oxford	Altimetric	Citations	Consitency	Selection bias
	Randomized controlled trial	PEDro	8/10	Good	1b	43	7	Partial	No
	Detailed PEDro Score	1	2	3	4	5	6	7	8	9	10	11
		Yes	Yes	Yes	Yes	No	No	Yes	Yes	Yes	Yes	Yes
74	Raposo F, Ramos M, Lúcia Cruz A. Effects of exercise on knee osteoarthritis: A systematic review. Musculoskeletal Care. 2021;19(4):399-435. doi:10.1002/msc.1538
	Design	Scale	Score	Quality	Oxford	Altimetric	Citations	Consitency	Selection bias
	Systematic review	AMSTAR II	6/13	Poor	1a	6	2	Partial	No
	Detailed AMSTAR Score	1	2	3	4	5	6	7	8	9	10	11	12	13	14	15	16
		No	No	Yes	Yes	Yes	No	No	Yes	Yes	No	N/A	N/A	No	No	N/A	Yes
75	Readinger J, Eastlack M, Von Nieda K, Kantak S, Sawyer K. Feasibility and longitudinal effects of repeated participation in an annual, brief and intense exercise program in individuals with Parkinson’s disease: A case report. Physiother Theory Pract. Published online July 27, 2021:1-12. doi:10.1080/09593985.2021.1952667
	Design	Scale	Score	Quality	Oxford	Altimetric	Citations	Consitency	Selection bias
	Case study	N/A	N/A	N/A	4	1	0	Accurate	No
76	Rhon DI, Deyle GD. Manual therapy: always a passive treatment? J Orthop Sports Phys Ther. 2021;51(10):474-477. doi:10.2519/jospt.2021.10330
	Design	Scale	Score	Quality	Oxford	Altimetric	Citations	Consitency	Selection bias
	Editorial	N/A	N/A	N/A	5	60	0	Accurate	No
77	Ricci NA, Aratani MC, Doná F, Macedo C, Caovilla HH, Ganança FF. A systematic review about the effects of the vestibular rehabilitation in middle-age and older adults. Rev Bras Fisioter. 2010;14(5):361-371.
	Design	Scale	Score	Quality	Oxford	Altimetric	Citations	Consitency	Selection bias
	Systematic review	AMSTAR II	5/13	Poor	1a	1	41	Accurate	No
	Detailed AMSTAR Score	1	2	3	4	5	6	7	8	9	10	11	12	13	14	15	16
		No	No	Yes	Yes	Yes	No	No	Yes	Yes	No	N/A	N/A	No	No	N/A	No
78	Rocha TC, Ramos PDS, Dias AG, Martins EA. The Effects of physical exercise on pain management in patients with knee osteoarthritis: a systematic review with metanalysis. Rev Bras Ortop. 2020;55(5):509-517. doi:10.1055/s-0039-1696681
	Design	Scale	Score	Quality	Oxford	Altimetric	Citations	Consitency	Selection bias
	Systematic review	AMSTAR II	44728	Poor	1a	1	1	Partial	No
	Detailed AMSTAR Score	1	2	3	4	5	6	7	8	9	10	11	12	13	14	15	16
		No	No	Yes	No	Yes	No	No	Yes	Yes	No	Yes	No	No	No	No	Yes
79	Rodrigues A, Muñoz Castro G, Jácome C, Langer D, Parry SM, Burtin C. Current developments and future directions in respiratory physiotherapy. Eur Respir Rev Off J Eur Respir Soc. 2020;29(158):200264. doi:10.1183/16000617.0264-2020
	Design	Scale	Score	Quality	Oxford	Altimetric	Citations	Consitency	Selection bias
	Narrative review	N/A	N/A	N/A	N/A	92	4	Accurate	No
80	Saeterbakken AH, Makrygiannis P, Stien N, et al. Dose-response of resistance training for neck-and shoulder pain relief: a workplace intervention study. BMC Sports Sci Med Rehabil. 2020;12:8. doi:10.1186/s13102-020-0158-0
	Design	Scale	Score	Quality	Oxford	Altimetric	Citations	Consitency	Selection bias
	Randomized controlled trial	PEDro	3/10	Poor	1b	112	2	Partial	Yes
	Detailed PEDro Score	1	2	3	4	5	6	7	8	9	10	11
		No	Yes	No	No	No	No	No	No	No	Yes	Yes
81	Santos CP, Proença M, Gouveia TDS, et al. Effectiveness of aerobic exercise on smoking cessation in adults: a systematic review and meta-analysis. J Phys Act Health. 2021;18(2):230-242. doi:10.1123/jpah.2019-0339
	Design	Scale	Score	Quality	Oxford	Altimetric	Citations	Consitency	Selection bias
	Systematic review	AMSTAR II	13/16	Good	1a	1	0	Partial	Yes
	Detailed AMSTAR Score	1	2	3	4	5	6	7	8	9	10	11	12	13	14	15	16
		Yes	Yes	Yes	Yes	Yes	Yes	No	Yes	Yes	No	Yes	Yes	Yes	Yes	Yes	No
82	Sayenko DG, Atkinson DA, Mink AM, et al. Vestibulospinal and corticospinal modulation of lumbosacral network excitability in human subjects. Front Physiol. 2018;9:1746. doi:10.3389/fphys.2018.01746
	Design	Scale	Score	Quality	Oxford	Altimetric	Citations	Consitency	Selection bias
	Cross-sectional study	EIA	20/23	Poor	3b	1	4	Accurate	No
	Detailed EIA Score	1	2	3	4	5	6	7	8	9	10	11	12	13	14	15	16	17	18	19	20	21	22	23	24	25	26	27	28	29	30	31	32	33	34	35	36	37	38	39	40	41	42	43
		2	N/A	2	0	0	0	0	2	N/A	N/A	N/A	N/A	2	2	2	2	0	2	0	0	0	N/A	N/A	N/A	N/A	N/A	N/A	N/A	0	N/A	0	N/A	2	0	N/A	N/A	N/A	N/A	N/A	N/A	0	0	2
83	Schimidt A, Herzinger P, Matias D, Welling L. Influence of Pilates method on nonspecific lumbar pain. Arq Bras Neurocir Braz Neurosurg. 2020;39:300-305. doi:10.1055/s-0040-1716561
	Design	Scale	Score	Quality	Oxford	Altimetric	Citations	Consitency	Selection bias
	Narrative review	N/A	N/A	N/A	N/A	N/A	N/A	Partial	No
84	Shanmugam S, Mathias L, Manickaraj N, et al. Intramuscular electrical stimulation combined with therapeutic exercises in patients with shoulder adhesive capsulitis: a randomised controlled trial. Int J Surg Protoc. 2021;25(1):71-83. doi:10.29337/ijsp.25
	Design	Scale	Score	Quality	Oxford	Altimetric	Citations	Consitency	Selection bias
	Randomized controlled trial	PEDro	8/10	Good	1b	1	0	Partial	No
	Detailed PEDro Score	1	2	3	4	5	6	7	8	9	10	11
		No	Yes	Yes	Yes	No	No	Yes	Yes	Yes	Yes	Yes
85	Simonsmeier BA, Flaig M, Simacek T, Schneider M. What sixty years of research says about the effectiveness of patient education on health: a second order meta-analysis. Health Psychol Rev. Published online August 24, 2021:1-25. doi:10.1080/17437199.2021.1967184
	Design	Scale	Score	Quality	Oxford	Altimetric	Citations	Consitency	Selection bias
	Systematic review	AMSTAR II	9/16	Poor	1a	54	0	Partial	No
	Detailed AMSTAR Score	1	2	3	4	5	6	7	8	9	10	11	12	13	14	15	16
		No	No	Yes	Yes	Yes	No	No	Yes	Yes	No	Yes	No	Yes	No	Yes	Yes
86	Smith AH, Capin JJ, Zarzycki R, Snyder-Mackler L. Athletes with bone-patellar tendon-bone autograft for anterior cruciate ligament reconstruction were slower to meet rehabilitation milestones and return-to-sport criteria than athletes with hamstring tendon autograft or soft tissue allograft : secondary analysis from the ACL-SPORTS Trial. J Orthop Sports Phys Ther. 2020;50(5):259-266. doi:10.2519/…
	Design	Scale	Score	Quality	Oxford	Altimetric	Citations	Consitency	Selection bias
	Cohort study	EIA	40/29	Good	2b	43	8	Partial	No
	Detailed EIA Score	1	2	3	4	5	6	7	8	9	10	11	12	13	14	15	16	17	18	19	20	21	22	23	24	25	26	27	28	29	30	31	32	33	34	35	36	37	38	39	40	41	42	43
		2	2	2	2	0	2	2	2	2	0	N/A	0	2	2	2	2	0	0	2	0	2	N/A	N/A	N/A	N/A	N/A	N/A	2	0	N/A	0	N/A	2	2	N/A	N/A	0	N/A	N/A	N/A	2	2	2
87	Smith MD, Vicenzino B, Bahr R, et al. Return to sport decisions after an acute lateral ankle sprain injury: introducing the PAASS framework-an international multidisciplinary consensus. Br J Sports Med. 2021;55(22):1270-1276. doi:10.1136/bjsports-2021-104087
	Design	Scale	Score	Quality	Oxford	Altimetric	Citations	Consitency	Selection bias
	Guideline	AGREE II	48%	Poor	N/A	272	2	Accurate	No
	Detailed AGREE Score	1	2	3	4	5	6	7	8	Score
		7	7	6	1	1	1	7	1	(31-8)/48
88	Stedge HL, Armstrong K. The Effects of intermittent pneumatic compression on the reduction of exercise-induced muscle damage in endurance athletes: a critically appraised topic. J Sport Rehabil. 2021;30(4):668-671. doi:10.1123/jsr.2020-0364
	Design	Scale	Score	Quality	Oxford	Altimetric	Citations	Consitency	Selection bias
	Systematic review	AMSTAR II	5/13	Poor	2a	3	0	Accurate	No
	Detailed AMSTAR Score	1	2	3	4	5	6	7	8	9	10	11	12	13	14	15	16
		No	No	Yes	Yes	No	No	No	Yes	Yes	No	N/A	N/A	Yes	No	N/A	No
89	Tsokanos A, Livieratou E, Billis E, et al. The efficacy of manual therapy in patients with knee osteoarthritis: a systematic review. Med Kaunas Lith. 2021;57(7):696. doi:10.3390/medicina57070696
	Design	Scale	Score	Quality	Oxford	Altimetric	Citations	Consitency	Selection bias
	Systematic review	AMSTAR II	5/13	Poor	1a	32	0	Partial	No
	Detailed AMSTAR Score	1	2	3	4	5	6	7	8	9	10	11	12	13	14	15	16
		No	No	Yes	Yes	No	No	No	Yes	Yes	No	N/A	N/A	No	No	N/A	Yes
90	Tyler TF, Nicholas SJ, Campbell RJ, McHugh MP. The association of hip strength and flexibility with the incidence of adductor muscle strains in professional ice hockey players. Am J Sports Med. 2001;29(2):124-128. doi:10.1177/03635465010290020301
	Design	Scale	Score	Quality	Oxford	Altimetric	Citations	Consitency	Selection bias
	Cohort study	EIA	31/24	Good	2b	31	244	Partial	No
	Detailed EIA Score	1	2	3	4	5	6	7	8	9	10	11	12	13	14	15	16	17	18	19	20	21	22	23	24	25	26	27	28	29	30	31	32	33	34	35	36	37	38	39	40	41	42	43
		2	2	2	2	2	2	2	1	0	N/A	N/A	0	2	2	2	2	0	N/A	0	N/A	0	N/A	N/A	N/A	N/A	N/A	N/A	2	N/A	N/A	2	N/A	N/A	N/A	0	N/A	0	N/A	N/A	N/A	0	2	2
91	Vaegter HB, Fehrmann E, Gajsar H, Kreddig N. Endogenous modulation of pain: the role of exercise, stress, and cognitions in humans. Clin J Pain. 2020;36(3):150-161. doi:10.1097/AJP.0000000000000788
	Design	Scale	Score	Quality	Oxford	Altimetric	Citations	Consitency	Selection bias
	Narrative review	N/A	N/A	N/A	N/A	15	4	Partial	No
92	Vaegter HB, Jones MD. Exercise-induced hypoalgesia after acute and regular exercise: experimental and clinical manifestations and possible mechanisms in individuals with and without pain. Pain Rep. 2020;5(5):e823. doi:10.1097/PR9.0000000000000823
	Design	Scale	Score	Quality	Oxford	Altimetric	Citations	Consitency	Selection bias
	Narrative review	N/A	N/A	N/A	N/A	25	N/A	Partial	No
93	Vance CG, Dailey DL, Rakel BA, Sluka KA. Using TENS for pain control: the state of the evidence. Pain Manag. 2014;4(3):197-209. doi:10.2217/pmt.14.13
	Design	Scale	Score	Quality	Oxford	Altimetric	Citations	Consitency	Selection bias
	Narrative review	N/A	N/A	N/A	N/A	440	148	Partial	Yes
94	Vasconcelos R, Valadas L, Kuehner M, et al. Fisioterapia na disfunção temporomandibular. Saúde St Maria. 2019;45:13. doi:10.5902/2236583427266
	Design	Scale	Score	Quality	Oxford	Altimetric	Citations	Consitency	Selection bias
	Case study	N/A	N/A	N/A	4	N/A	N/A	Partial	No
95	Watson S, Louw A, Wingood M, et al. Pain neuroscience education for older adults. Phys Occup Ther Geriatr. 2022;40(1):50-63. doi:10.1080/02703181.2021.1970692
	Design	Scale	Score	Quality	Oxford	Altimetric	Citations	Consitency	Selection bias
	Cohort study	EIA	Assessment was not possible		N/A	3	0	Accurate	No
96	World Physiotherapy. Documento Informativo 9 sobre respostas do COVID-19 da World Physiotherapy - Abordagens de reabilitação segura para pessoas vivendo com a COVID Longa: atividade física e exercício. World Physiotherapy; 2021.
	Design	Scale	Score	Quality	Oxford	Altimetric	Citations	Consitency	Selection bias
	Guideline	AGREE II	44%	Poor	N/A	N/A	N/A	Accurate	No
	Detailed AGREE Score	1	2	3	4	5	6	7	8	Score
		1	1	6	1	5	1	7	7	(29-8)/48
97	Yeung SS, Yeung EW, Gillespie LD. Interventions for preventing lower limb soft-tissue running injuries. Cochrane Database Syst Rev. 2011;(7):CD001256. doi:10.1002/14651858.CD001256.pub2
	Design	Scale	Score	Quality	Oxford	Altimetric	Citations	Consitency	Selection bias
	Systematic review	AMSTAR II	16/16	Good	1a	79	61	Inaccurate	No
	Detailed AMSTAR Score	1	2	3	4	5	6	7	8	9	10	11	12	13	14	15	16
		Yes	Yes	Yes	Yes	Yes	Yes	Yes	Yes	Yes	Yes	Yes	Yes	Yes	Yes	Yes	Yes
98	Young HJ, Mehta T, Kim Y, et al. The Spinal Cord Injury Program in Exercise (SCIPE) study: study protocol for a randomized controlled trial evaluating teleexercise programs for people with spinal cord injury. Trials. 2021;22(1):551. doi:10.1186/s13063-021-05474-4
	Design	Scale	Score	Quality	Oxford	Altimetric	Citations	Consitency	Selection bias
	Clinical trial protocol	N/A	N/A	N/A	N/A	2	0	Accurate	No
99	Zacharias AJ, Whitaker JR, Collofello BS, et al. Secondary injuries after pediatric anterior cruciate ligament reconstruction: a systematic review with quantitative analysis. Am J Sports Med. 2021;49(4):1086-1093. doi:10.1177/0363546520934774
	Design	Scale	Score	Quality	Oxford	Altimetric	Citations	Consitency	Selection bias
	Systematic review	AMSTAR II	7/16	Poor	2a	8	4	Partial	No
	Detailed AMSTAR Score	1	2	3	4	5	6	7	8	9	10	11	12	13	14	15	16
		Yes	No	Yes	Yes	Yes	No	No	Yes	Yes	No	Yes	No	No	No	No	No
100	Zajacova A, Grol-Prokopczyk H, Zimmer Z. Pain trends among american adults, 2002-2018: patterns, disparities, and correlates. Demography. 2021;58(2):711-738. doi:10.1215/00703370-8977691
	Design	Scale	Score	Quality	Oxford	Altimetric	Citations	Consitency	Selection bias
	Cross-sectional study	EIA	27/20	Good	N/A	211	6	Partial	No
	Detailed EIA Score	1	2	3	4	5	6	7	8	9	10	11	12	13	14	15	16	17	18	19	20	21	22	23	24	25	26	27	28	29	30	31	32	33	34	35	36	37	38	39	40	41	42	43
		1	N/A	2	2	2	0	2	2	N/A	N/A	N/A	N/A	2	2	2	2	0	N/A	0	N/A	0	N/A	N/A	N/A	N/A	N/A	N/A	N/A	N/A	N/A	0	N/A	2	N/A	N/A	2	N/A	N/A	N/A	N/A	2	0	2
101	Zhong Y, Zheng C, Zheng J, Xu S. Kinesio tape reduces pain in patients with lateral epicondylitis: A meta-analysis of randomized controlled trials. Int J Surg Lond Engl. 2020;76:190-199. doi:10.1016/j.ijsu.2020.02.044
	Design	Scale	Score	Quality	Oxford	Altimetric	Citations	Consitency	Selection bias
	Systematic review	AMSTAR II	9/16	Poor	1a	63	8	Partial	Yes
	Detailed AMSTAR Score	1	2	3	4	5	6	7	8	9	10	11	12	13	14	15	16
		No	No	Yes	Yes	No	Yes	No	Yes	Yes	No	Yes	No	No	Yes	Yes	Yes

## Sheet: Scales for quality assessment
Items PEDro Scale		Items AMSTAR 2		Epidemiological Appraisal Instrument (EIA)
1. Eligibility criteria (*item not scored)		1. Question and inclusion criteria based on PICO		1. Is the hypothesis/aim/objective of the study clearly described?
2. Participants randomly allocated to groups		2. Regristration a priori		2. Are all the exposure variables/intervention(s) clearly described?
3. Allocation was concealed		3. Explanation about the design fo included studies		3. Are the main outcomes clearly described?
4. Similarity among groups at baseline		4. Use of a comprehensive search strategy		4. Is the study design clearly described?
5. Blinding of subjects		5. Study selecion in duplicate		5. Is the source of subject population (including sampling frame) clearly described?
6. Blinding of therapists		6. Data extraction in duplicate		6. Are the eligibility criteria for subject selection clearly described?
7. Blinding of all assessors		7. List of excluded studies with reasons		7. Are the participation rate(s) reported? Are ascertainments of record availability described?
8. Results from more than 85% of allocated subjects		8. Description of included studies		8. Are the characteristics of study participants described?
9. Intention-to-treat approach		9. Assessment of risk of bias in individual studies		9. Have the characteristics of subjects lost after entry into the study or subjects not participating from among the eligible population been described? Have the details of unavailable records been described?
10. Between-group comparisons		10. Source of funding for included studies		10. Have all important adverse effects been reported that may be consequences of the intervention(s)?
11. Presentation of point estimates and variability		11. Apprpriate statistical method for meta-analysis		11. Are the important covariates and confounders described in terms of individual variables?
		12. Use of evidence systhesis for meta-analysis		12. Are the important covariates and confounders in terms of environment variables described?
		13. Use of risk of bias for result interpretation		13. Are the statistical methods clearly described?
		14. Explanation about heterogeneity		14. Are the main findings of the study clearly described?
		15. Investigation on publication bias		15. Does the study provide estimates of the random variability in the data for the main outcomes or exposures?
		16. Report of potential sources of conflict of interest		16. Does the study provide estimates of the statistical parameters?
				17. Are sample size calculations performed and reported?
				18. Is the comparison/reference group comparable to the exposed/intervention/case group?
Domain 3 of AGREE II				19. Is the participation rate adequate? Is the ascertainment of record availability adequate?
1. Systematic methods were used to search for evidence				20. Are the study subjects from different groups recruited over the same period of time?
2. The criteria for selecting the evidence are clearly described				21. Are subject losses or unavailable records after entry into the study taken into account?
3. The strengths and limitations of the body of evidence are clearly described				22. Are newly incident cases taken into account?
4. The methods for formulating the recommendations are clearly described				23. Are the study subjects randomized to groups?
5. The health benefits, side effects, and risks have been considered in formulating the recommendations				24. Is the randomized assignment to groups concealed from both subjects and observers until recruitment is complete and irrevocable?
6. There is an explicit link between the recommendations and the supporting evidence				25. Are the exposure variables reliable?
7. The guideline has been externally reviewed by experts prior to its publication				26. Are the exposure variables valid?
8. A procedure for updating the guideline is provided				27. Are the methods of assessing the exposure variables similar for each group?
				28. Is exposure conducted at a time prior to the occurrence of disease or symptoms?
				29. Are the observers blinded to: subject groupings when the exposure/intervention assessment was made or the disease status of subjects when conducting exposure assessment?
				30. Are the subjects blinded to their grouping when the exposure/intervention assessment was made?
				31. Are the main outcome measures reliable?
				32. Are the main outcome measures valid?
				33. Are the methods of assessing the outcome variables standard across all groups?
				34. Are the observations taken over the same time for all groups?
				35. Is prior history of disease and/or symptoms collected and included in the analysis?
				36. Is there adequate adjustment for covariates and confounders in terms of individual variables in the analysis?
				37. Is there adequate adjustment for covariates and confounders in terms of environment variables (other than exposure) in the analyses?
				38. Is the minimum follow-up time since initial exposure sufficient enough to detect a relationship between exposure/intervention and outcome?
				39. Do the analyses adjust for different lengths of follow-up of subjects in cohort/intervention studies; is the time period between the exposure and outcome the same for cases and controls?
				40. Are outcome data reported by levels of exposure?
				41. Are the outcome/exposure data reported by subgroups of subjects?
				42. Can the study results be applied to the eligible population?
				43. Can the study results be applied to other relevant populations?
